# Supplementary material for: Zebrafish as a model to study live mucus physiology
Source: PubMed Central journal article supplement — Sci Rep. 2014 Oct 17;4:6653. doi: 10.1038/srep06653 (PMC4200417; doi:10.1038/srep06653), 2014-10-17
Supplement: srep06653-s1.pdf [file srep06653-s1.pdf]

**Supplementary Information:**

**Zebrafish as a model to study live mucus physiology**

\*Correspondence: ribbeck@mit.edu

Irena Jevtov<sup>1</sup>, Tore Samuelsson<sup>2</sup>, Grace Yao<sup>1</sup>, Adam Amsterdam<sup>3</sup>, Katharina Ribbeck<sup>1</sup>

<sup>1</sup>Department of Biological Engineering, Massachusetts Institute of Technology, Cambridge, MA

<sup>2</sup>Department of Medical Biochemistry and Cell Biology, Institute of Biomedicine, Sahlgrenska Academy at University of Gothenburg, Göteborg, Sweden

<sup>3</sup>David H. Koch Institute for Integrative Cancer Research, Massachusetts Institute of Technology, Cambridge, MA

## Supplementary Information

**Supplementary Figure S1.** Genomic structure of five predicted polymeric secreted mucins in zebrafish.

**Supplementary Figure S2.** Neighbor-joining phylogenetic tree of mucins in zebrafish, human, and chicken.

**Supplementary Figure S3.** Alignment of gel-forming secreted mucins from zebrafish, human, and chicken.

**Supplementary Figure S4.** *In situ* hybridization of the secreted mucins in sagittal sections of adult zebrafish.

**Supplementary Figure S5.** Differential expression of *muc5.1* and *muc5.2* in gill lamellae.

**Supplementary Figure S6.** qRT-PCR analysis of mucin gene expression during zebrafish development.

**Supplementary Figure S7.** Generation of the fluorescent mucin reporter *muc5.1:S-RFP*.

**Supplementary Table S1.** Additional identified mucin-like fragments in the zebrafish genome.

**Supplementary Addendum S1.** Protein sequences of secreted gel-forming mucins in zebrafish used for the construction of the protein domain models.

**Supplementary Addendum S2.** Protein sequences used for the construction of the phylogenetic trees.

**Supplementary Addendum S3.** Sequences of the verification transcripts.

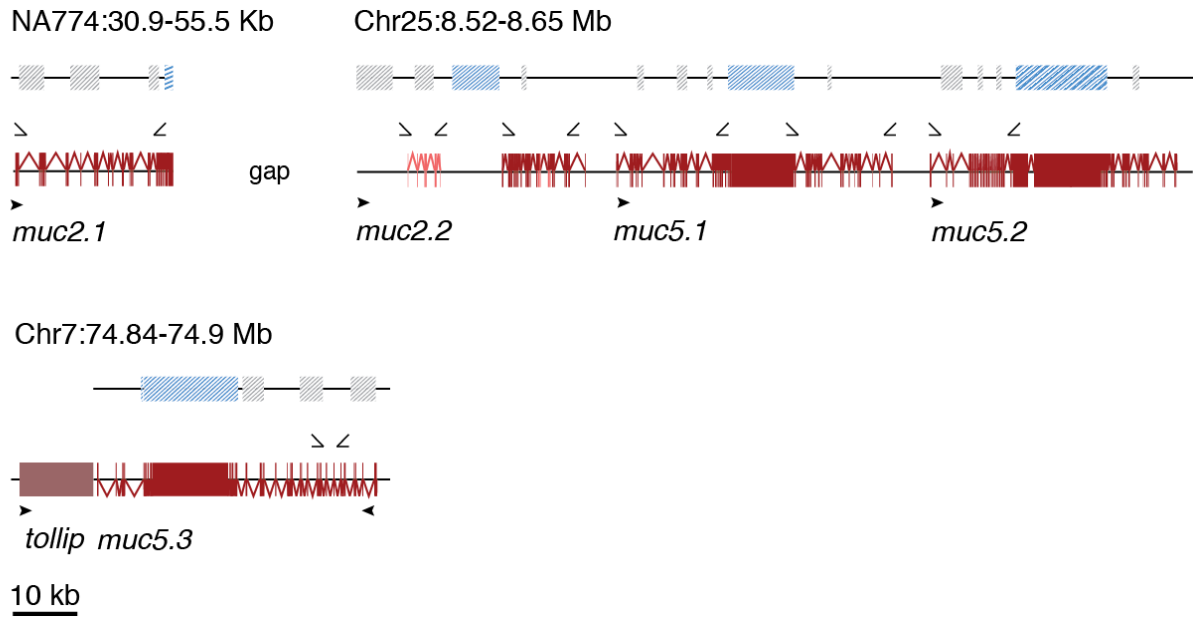

**Supplementary Figure S1.** Genomic structure of five predicted polymeric secreted mucins in zebrafish. Four of the mucins have been assigned across chromosomes 25 and 7. For *muc2.1*, the genomic position is unknown and hence, it is arbitrarily depicted left to the mucin gene cluster on chr25, relative to the position of the gap in the current genome assembly. The top bars show the genomic locations of computationally predicted VWD and PTS coding domains. PTS domains (blue boxes) were predicted by PTSPRED<sup>22, 23</sup> and VWD domains (grey boxes) were predicted by Genewise<sup>37</sup>. Ensembl transcript models<sup>36</sup> (in red) for the corresponding genomic regions are aligned below. To confirm the computationally predicted mucin domains we experimentally verified selected regions of each mucin transcript with RT-PCR and sequencing (pointers above transcript models represent the positions of the amplification primers). In pink is an addition to the *muc2.2* transcript that emerged from our experiments and that was missing in the Ensembl transcript model.

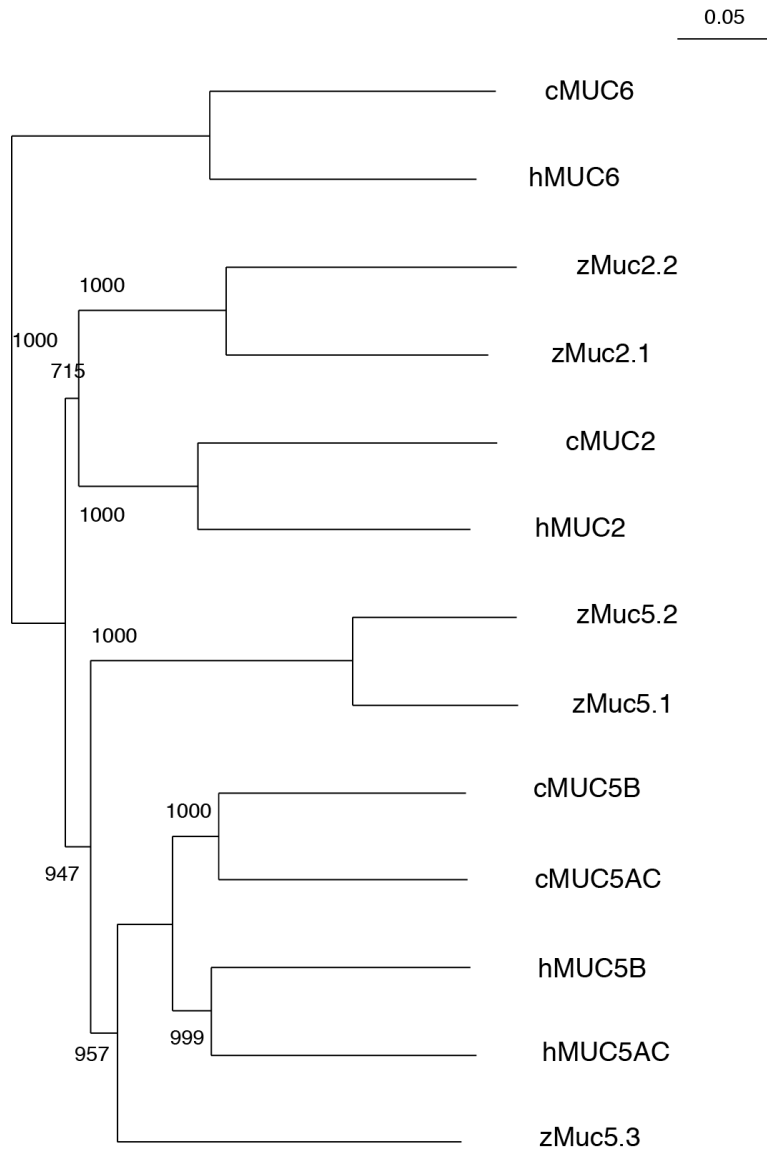

**Supplementary Figure S2.** Neighbor-joining phylogenetic tree of mucins in zebrafish, human, and chicken. The tree uses the same the N-terminal mucin sequences as the MrBayes tree in Fig. 1b. Numbers at branches represent bootstrap values. The tree reveals the same relationship among the mucins as MrBayes and is therefore a confirmation of their phylogenetic status. The only difference is seen with Muc5.3, which appears more distant from Muc5.1 and Muc5.2 and groups closer to the chicken and human mucins.

```
danner_Muc2.2 1 STWESFHFHKTDPDDIYQVPLGELNVLVSQDSCTS--KQPSVDVKKRQTQ--TSSGPKISRIVVSIKNGKMFISINNVMIDDO-IKLPVYVSSGLIET--ENTITVNG 95
danner_Muc2.1 1 SMWGNFHFHKTDPDDIYQVPLGELNVLVSQDSCTS--KQPSVDVKKRQTQ--TSSGPKISRIVVSIKNGKMFISINNVMIDDO-IKLPVYVSSGLIET--ENTITVNG 97
homsap_MUC2C 1 STWGNFHFHKTDPDDIYQVPLGELNVLVSQDSCTS--KQPSVDVKKRQTQ--TSSGPKISRIVVSIKNGKMFISINNVMIDDO-IKLPVYVSSGLIET--ENTITVNG 97
galgal_Muc2 1 STWGNFHFHKTDPDDIYQVPLGELNVLVSQDSCTS--KQPSVDVKKRQTQ--TSSGPKISRIVVSIKNGKMFISINNVMIDDO-IKLPVYVSSGLIET--ENTITVNG 98
homsap_MUC5AC 1 STWGSFHYKTPDGDVFRFPGLQVYFVREHCAAAEDFNILRRSSO--ESAAPLSTRVLMKVDVVIQILKGSVLDVNH--LLPLFRSOSGVLID--SSSYIK 97
homsap_MUC5B 1 STWQDFHYKTPDGDVFRFPGLQVYFVREHCAAAEDFNILRRSSO--ESAAPLSTRVLMKVDVVIQILKGSVLDVNH--LLPLFRSOSGVLID--SSSYIK 97
galgal_Muc5AC 1 STWGNFHFHKTDPDDIYQVPLGELNVLVSQDSCTS--KQPSVDVKKRQTQ--TSSGPKISRIVVSIKNGKMFISINNVMIDDO-IKLPVYVSSGLIET--ENTITVNG 97
galgal_Muc5B 1 CFWGNFHFHKTDPDDIYQVPLGELNVLVSQDSCTS--KQPSVDVKKRQTQ--TSSGPKISRIVVSIKNGKMFISINNVMIDDO-IKLPVYVSSGLIET--ENTITVNG 97
danner_Muc5.3 1 STWGNHYKTPDGDVFRFPGLQVYFVREHCAAAEDFNILRRSSO--ESAAPLSTRVLMKVDVVIQILKGSVLDVNH--LLPLFRSOSGVLID--SSSYIK 97
danner_Muc5.2 1 STWGNFHFHKTDPDDIYQVPLGELNVLVSQDSCTS--KQPSVDVKKRQTQ--TSSGPKISRIVVSIKNGKMFISINNVMIDDO-IKLPVYVSSGLIET--ENTITVNG 97
danner_Muc5.1 1 STWGNFHFHKTDPDDIYQVPLGELNVLVSQDSCTS--KQPSVDVKKRQTQ--TSSGPKISRIVVSIKNGKMFISINNVMIDDO-IKLPVYVSSGLIET--ENTITVNG 97
galgal_Muc6 1 STWGGGHFSTDFKYYQDFDTQGYNYIFAATGKDAFPSPFGLRRPL----DQSLIARLIVELGASVVTSFAIISVKDVIISLPTVSNGLITPFGVGRVRLVA 98
1 SWGGGHFSTDFKYYQDFDTQGYNYIFAATGKDAFPSPFGLRRPL----DQSLIARLIVELGASVVTSFAIISVKDVIISLPTVSNGLITPFGVGRVRLVA 98

danner_Muc2.2 96 IRSKTLGLVMWSGLDAVVELLNKVKYQKTCGLGNGFNRIQDEF-ITGNTKLGVEFGNKHVNPFMFCENPSETDEKNNWKAICGS-----182
danner_Muc2.1 96 LYSKMGITVMWKKDAMVELDSKVSNRTTCLGCGDFNIPVNEFIOQSRTVGYTFEFGNMRVVPNFHOCDFPENVDQNVVDGQCEK-----185
homsap_MUC2C 100 VYSRAGLTLVMNRDALMELDTKFRHITCGLCGDYNGLOVSEFSLSDVLFPSLFEFGNMOKINQPDVVCDEPEEEVAFASCSEHR-----185
galgal_Muc2 99 VYAKLGLLILVWNRDALMELDTKFRHITCGLCGDYNGVPIINNEFSIGVASNNTVGNLDKISKPNBCECDPDETRALSCNEHVSFKPNCELRFPCCMETSL 201
homsap_MUC5AC 98 VEALRGLLVMWNRDALMELDTKFRHITCGLCGDYNGVPIINNEFSIGVASNNTVGNLDKISKPNBCECDPDETRALSCNEHVSFKPNCELRFPCCMETSL 201
homsap_MUC5B 98 VSIKLVLTFLWNRDALMELDTKFRHITCGLCGDYNGVPIINNEFSIGVASNNTVGNLDKISKPNBCECDPDETRALSCNEHVSFKPNCELRFPCCMETSL 182
galgal_Muc5AC 98 VSKALGLLFLWNRDALMELDTKFRHITCGLCGDYNGVPIINNEFSIGVASNNTVGNLDKISKPNBCECDPDETRALSCNEHVSFKPNCELRFPCCMETSL 183
galgal_Muc5B 98 VYSKLDIVFMWNRDALMELDTKFRHITCGLCGDYNGVPIINNEFSIGVASNNTVGNLDKISKPNBCECDPDETRALSCNEHVSFKPNCELRFPCCMETSL 177
danner_Muc5.3 98 IKAALGLVAMWNRDALMELDTKFRHITCGLCGDYNGVPIINNEFSIGVASNNTVGNLDKISKPNBCECDPDETRALSCNEHVSFKPNCELRFPCCMETSL 182
danner_Muc5.2 98 ISNKHGVTVFWEEDNSLIELREKVGQTCGLCGDYNGVPIINNEFSIGVASNNTVGNLDKISKPNBCECDPDETRALSCNEHVSFKPNCELRFPCCMETSL 175
danner_Muc5.1 98 ISLRYMGTVFWEEDNSLIELREKVGQTCGLCGDYNGVPIINNEFSIGVASNNTVGNLDKISKPNBCECDPDETRALSCNEHVSFKPNCELRFPCCMETSL 171
homsap_MUC6 99 KOLELELVWVGGVPSHMLMLVLRKVMGCGLCGDFNGGKDFSGEVEVSEKRFEPKFAALDKLDDPGEICTFQDIPSTHVRQAQH-----183
galgal_Muc6 99 KLMBELRLVWVGGVPSHMLMLVLRKVMGCGLCGDFNGGKDFSGEVEVSEKRFEPKFAALDKLDDPGEICTFQDIPSTHVRQAQH-----182

danner_Muc2.2 183 ----YQADQELFRFKAWSSCAMSJHF--YVDAQVYVRCRFBK----SSLGAFLSEYSRQCQRNNGTIPSTWRKDFCAVTCPVTNTVFESGSPCIDTCSG 274
danner_Muc2.1 186 ----YRADDLDELEKSWSCSWLDRPEAYIKACTNLDLCNRQREDDTALCGATLEYSRQCQSHAGGPNPAWRATKFCNVCOOCPYMMVYSSESPCMDCSKH 283
homsap_MUC2C 186 ----AEGERLITAEAFADCDLVLEPYLRAQQDQRCRRPQDGT--CVCSITAEFRCQSHAGGRRPNWRATLCKR--TCPGILLVYLSSESPCMDCSHL 278
galgal_Muc2 202 HCEMLRREEKGLTSSAFADCHSRLNLEMYIQAQCMDQKAQKGFNE--DSFCLGSIIEYSRQCQSHAGGRRPNPAWRATKFCNVCOOCPYMMVYSSESPCMDCSKH 270
homsap_MUC5AC 183 ----GICEQLLHQGLFSGCVLVVDSVYLEARODLCCGEDT--LLSVCVCHTAEYSROCHAGGLQDQWRGPPDFPQK--KQPNMMDYHCRSPACDTCG 277
homsap_MUC5B 183 ----GICHRLLGLPFAFACHALVDTAALAQAQQDLGCRD--TTCPCATFVEYSRQCAHAGGPRNWKRCHELGR--TCLPMLHOCBSPGTDICG 272
galgal_Muc5AC 184 ----ASLGKTLTSEAFISGNALVDQYQDIDGQIQDLGHGDTSM--ADFEMGNFAFVRSQCAHAGGPRNWKRCHELGR--TCLPMLHOCBSPGTDICG 255
galgal_Muc5B 183 ----FRDQIFSSRVFSCDRGLVSIQSFOVQIQDLCHGNSSS--BAFLQDITAEYSRQCQVHAGGKPEEWRTEYFCRH--PCEPTEYVYSKCNPCDTCT 276
danner_Muc5.3 176 ----ASFGEYLISPGSGCYVDMDFIKQKACVSDLCQCYBN--HDCLCNTLETISRQCCHAGGPPGTRWTEQLCRK--TCPLNLOVYELCGGPKCTCS 269
danner_Muc5.2 172 ----TMVQCOYLSSPGSGCYVDMDFIKQKACVSDLCQCYBN--HDCLCNTLETISRQCCHAGGPPGTRWTEQLCRK--MCPILNLOVYELCGGPKCTCS 265
danner_Muc5.1 184 ----ARICGTQLL--LVAPCVSKVFVLLSGQAVAAQPP--PONSSGATLEYSRQCQVMVGGVFRVRRVSPGLCSVQCOCAVQYOCESACVYKCP 277
galgal_Muc6 183 ----AVIGSOLLN--LVSPCTCVSKVDFGTRQLMDQDSEPP--QKNGSGLSEYSRQCQVMVGGVFRVRRVSPGLCSVQCOCAVQYOCESACVYKCP 276

danner_Muc2.2 275 TINTQEEHNFIDGFCPPGVTVFDLILNMGCI--REGQCHKHDRIVYKBOEL--VSGDQVCONKWNCKIKVPLRRCVVEESHFTFQDQEFTHGDCYV 372
danner_Muc2.1 294 DTNALCEEHNIDGFCPPGVTVFDLISDT--GQPAEKQOKHQRVHLSSEYLRKSEEEVQGOESVWQMSIPGGGLGAVEGESHFTFDGKCFVFGDQNY 383
homsap_MUC2C 275 EYSLCEEHNIDGFCPPGVTVFDLIGDS--GVVPSVCHRLHRVTVSGEITNDQECVGNAGRWCKLPCPGCALGEGSHFTFDGKCFVFGDQNY 379
galgal_Muc2 271 ----TVYDDITEN--GVVPSVCHRLHRVTVSGEITNEDEEECTDQSRWTCGLPVPVCSVGGSHKFTDQKQVTVFGDCYV 352
homsap_MUC5AC 272 EHSRAEDCHVDGFCPPGVTVLDDIGOT--GVVPSVCHRLHRVTVSGEITNEDEEECTDQSRWTCGLPVPVCSVGGSHKFTDQKQVTVFGDCYV 378
homsap_MUC5B 273 QRAQLCEDHVDGFCPPGVTVLDDITHS--GCLPLGCTPCTGGRTVSPGTFNFTTCSSTCSGGLWQODLPCPGCSVGGGAHSTYBEKLVLDHDCSYV 374
galgal_Muc5B 256 ----RMLFDDINGA--GCLPRKCECTPCTGGRTVSPGTFNFTTCSSTCSGGLWQODLPCPGCSVGGGAHSTYBEKLVLDHDCSYV 338
178 ----GTMNF-----183
danner_Muc5.3 277 ERDQYCAQNDGFCPPGVTVYDDIHOS--GCLFYVCECVLGGKIMASGELNYSNRDQDQDQODHWYIKDCHPCVGGSHFTFDGKCFVFGDQNY 377
danner_Muc5.1 270 TANLMCTDCHVDGFCPPGVTVYDDIGDS--GVVPSVCHRLHRVTVSGEITNDQECVGNAGRWCKLPCPGCALGEGSHFTFDGKCFVFGDQNY 370
danner_Muc5.2 266 T AHLMTDCHVDGFCPPGVTVYDDIGDS--GVVPSVCHRLHRVTVSGEITNDQECVGNAGRWCKLPCPGCALGEGSHFTFDGKCFVFGDQNY 366
homsap_MUC6 278 QHS----CSSCTYDGFCEP--TVLNLSNNTGVPTGCVHDGLHGAMVAPGVET--IAACQTGRLTBRWVCTERPPCGHCLGEGSHFTFDGKCFVFGDQNY 377
galgal_Muc6 277 EYS----CSSCTYDGFCEP--TVLDDISNRTCVHLG--GCLPRKCECTPCTGGRTVSPGTFNFTTCSSTCSGGLWQODLPCPGCSVGGGAHSTYBEKLVLDHDCSYV 376

danner_Muc2.2 378 VVSK--FILLQVSPCASLIVQCLKIDVIFNDVNDKKNLFDGDEGVKHNAVLLVYPAARQVFPVSPSEFVILLO--NPLRVLVQLVLMQVYITDK 478
danner_Muc2.1 384 LVQGEESK--FILLQVSPCASLIVQCLKIDVIFNDVNDKKNLFDKADBTQVQAVEVPLVYVYAD--FFVFRSPSEFVILLO--VFLQVQLVQLVLMQVY 481
homsap_MUC2C 380 LAKQDHNDS--MALLGLAUGCSTGCTCLTKTAVLLADKKNAVFKDSVLLNLEIQV--NLPHYATSFVFRPSSVYIMVMSM--A--GTRVLQVLAAPVLMV 478
galgal_Muc2 353 LAKSAYNDT--HALLGLAUGCSTGCTCLTKTAVLLADKKNAVFKDSVLLNLEIQV--NLPHYATSFVFRPSSVYIMVMSM--A--GTRVLQVLAAPVLMV 451
homsap_MUC5AC 379 LTKPCDSSA--FTVLAELRKCGTIDSEICLKSVTLLDQAGVVVVKA--SSEVFLNQIYV--QLPISAANVIFRPSPFFIJAOT--SLGLQLVLPVLMQV 477
homsap_MUC5B 375 LSKKCADSS--FTVLAELRKCGTIDSEICLKSVTLLDQAGVVVVKA--SSEVFLNQIYV--QLPISAANVIFRPSPFFIJAOT--SLGLQLVLPVLMQV 473
galgal_Muc5AC 339 LTKLCSND--FTVLGDHKKGTLTDTCKGVAIISLSSGQTNVYIOP--SGSVFNMIYV--QLPISAANVIFRPSPFFIJAOT--TFGLQVLPVLMQV 437
galgal_Muc5B 184 ----CEDEI--FTILVLELRKCGMFINETCLKVTLSMKNKGOILEVKT--DQGVEMNSIYV--QLPISAANVIFRPSPFPVIMH--NIGIQVYIITPIMQV 278
danner_Muc5.3 378 LTKQGSST--FTVLGDLVYCSLTERCLMAITVAFIDGIVINVD--SBNVFNRIYA--QLPFTSSVFKPSFYIIIEARL--QLRLRIELVPMQLY 477
danner_Muc5.1 371 LTKHADS--FAVNGLAKGEARIDTCLHHTVLIQSE--ITISFSSDQVTLNINNKELPSTVPVSIQPPSPFIIYVDL--HSVRLEGLAPMQLY 467
danner_Muc5.2 367 LKHNSDS--FAVNGLAKGEARIDTCLNVTLSQSE--ITISFSSDQVTLNINNKELPSTVPVSIQPPSPFIIYVDL--NSRLRLGLAPMQLY 463
homsap_MUC6 378 LTKSPLEPDKGALAVDQSGVSHSTSLVAVVLRODKIIVISDQ--VVTNNGEAKWPKYKTRNIVFRSITSLHMAI--V--NGLRLVQLVRLVY 475
galgal_Muc6 377 LTKSPLEPDKGALAVDQSGVSHSTSLVAVVLRODKIIVISDQ--VVTNNGEAKWPKYKTRNIVFRSITSLHMAI--V--NGLRLVQLVRLVY 474

danner_Muc2.2 479 FQCK-----THELCCGNFKVADMDKTPQGLVEGVAVSFAVNAWEVE--TNC--SR--KSVIFPCSNVSVYENAEHWCKITMDK 554
danner_Muc2.1 482 VQDSFQCK-----TCBLCGNFKVADMDKTPQGLVEGVAVSFAVNAWEVE--TNC--SR--KSVIFPCSNVSVYENAEHWCKITMDK 559
homsap_MUC2C 479 LDPAASGK-----VDLCCGNFKVADMDKTPQGLVEGVAVSFAVNAWEVE--TNC--SR--KSVIFPCSNVSVYENAEHWCKITMDK 556
galgal_Muc2 452 ADDSVDIOGKCLKQEAKEKISTAVKSYILYMGKLCGDFNGMEQDFK--TNGLVLEAGSFAFANTWKAQ--STGADKLVDLDDPCSLNLSANNAEAWHWSCKL 553
homsap_MUC5AC 478 LAKPLRGK-----TCGLCGNFNSLADDFRLLSGVVEAAAFANFTTQTO--AACRNIRNSFEDPCSLSVENKVAHWCGRLLD 555
homsap_MUC5B 474 LPAHAGK-----MCGLCGNFNSLADDFRLLSGVVEAAAFANFTTQTO--AACRNIRNSFEDPCSLSVENKVAHWCGRLLD 551
galgal_Muc5AC 438 LDPSQKGD-----TCGLCGNFNSLADDFRLLSGVVEAAAFANFTTQTO--AACRNIRNSFEDPCSLSVENKVAHWCGRLLD 515
galgal_Muc5B 279 LDVYFKGD-----TCGLCGNFNSLADDFRLLSGVVEAAAFANFTTQTO--AACRNIRNSFEDPCSLSVENKVAHWCGRLLD 356
danner_Muc5.3 478 ANSVYQGE-----TCGLCGNFNSLADDFRLLSGVVEAAAFANFTTQTO--AACRNIRNSFEDPCSLSVENKVAHWCGRLLD 555
danner_Muc5.2 488 STEEKK-----MTGLCGNFNSLADDFRLLSGVVEAAAFANFTTQTO--AACRNIRNSFEDPCSLSVENKVAHWCGRLLD 543
danner_Muc5.1 484 STEEKK-----MTGLCGNFNSLADDFRLLSGVVEAAAFANFTTQTO--AACRNIRNSFEDPCSLSVENKVAHWCGRLLD 542
homsap_MUC6 476 VQDFRGK-----TRGLCGNFNSLADDFRLLSGVVEAAAFANFTTQTO--AACRNIRNSFEDPCSLSVENKVAHWCGRLLD 552
galgal_Muc6 475 VSAQFQR-----TLGLCGNFNSLADDFRLLSGVVEAAAFANFTTQTO--AACRNIRNSFEDPCSLSVENKVAHWCGRLLD 551
```

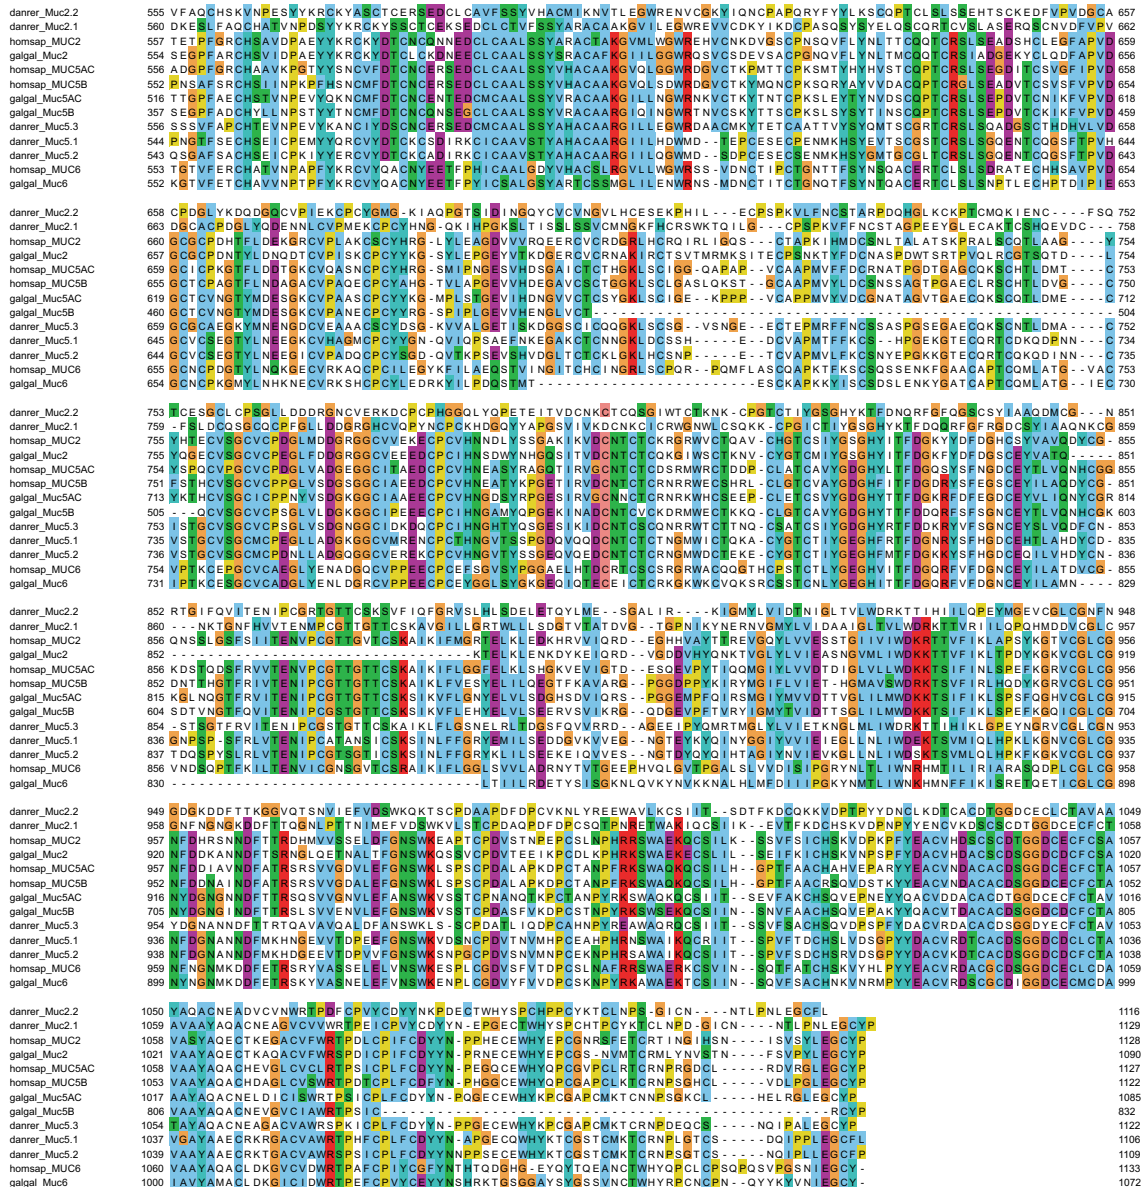

**Supplementary Figure S3.** Alignment of mucin sequences of gel-forming secreted domains from zebrafish, human, and chicken. Mucin containing the three N-terminal VWD domains were aligned using ClustalW and visualized in Jalview. These sequences are the same as those used for the construction of the phylogenetic trees in Fig. 1b and Supplementary Fig. S2.

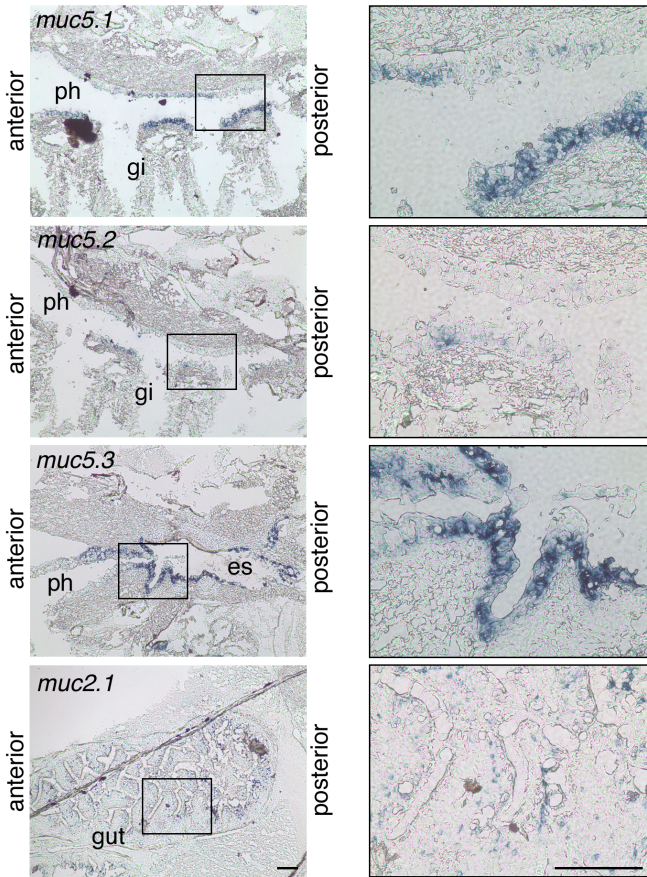

**Supplementary Figure S4.** *In situ* hybridization of the secreted mucins in sagittal sections of adult zebrafish. Image on the right shows an enlargement of the boxed area on the left. ph - pharynx, gi - gills, es - esophagus. DIG-UTP antisense RNA probes were used and positives are visualized in blue via NBT/BCIP reaction. The *in situ* hybridization signal suggests the localization of *muc5.1* and *muc5.2* in the pharynx, *muc5.3* in the esophagus, and *muc2.1* in the gut, supporting the RT-PCR data on isolated tissues in Fig 1c. Scale bar: 100  $\mu$ m.

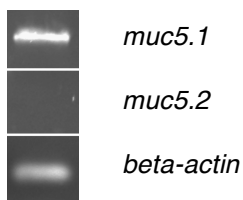

**Supplementary Figure S5.** Differential expression of *muc5.1* and *muc5.2* in gill lamellae. The gill lamellae were separated from the gill arches. The total RNA was extracted from the lamellae, transcribed into cDNA and mucin transcripts were amplified by PCR. *muc5.1* but not *muc5.2* is expressed in the lamellar part of the zebrafish gills.

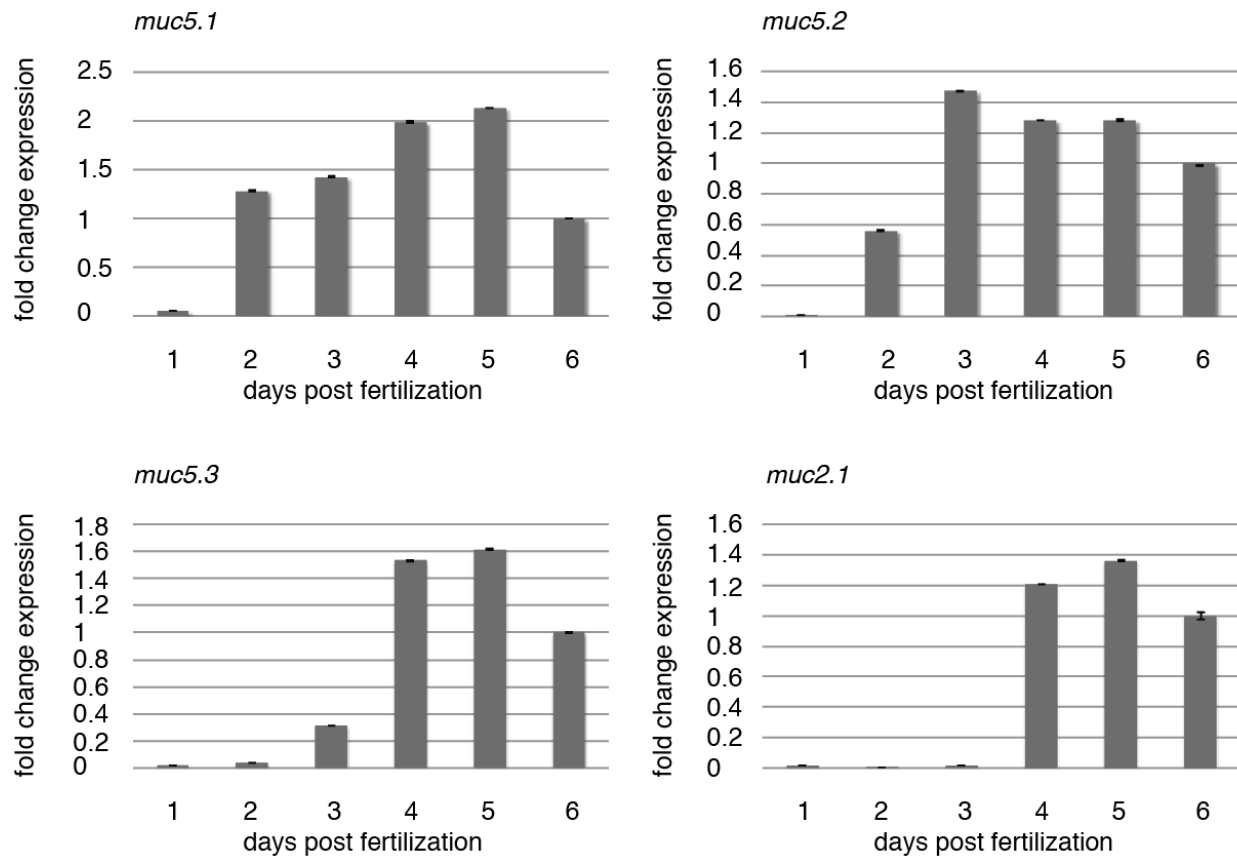

**Supplementary Figure S6.** qRT-PCR analysis of mucin gene expression during zebrafish development. The expression of individual mucin genes was normalized to *beta-actin* expression and compared to the expression at day six for each individual mucin. The timing of expression of each mucin correlates with the development of the respective organs in which they are found in the adult fish, namely the skin for *muc5.1* and *muc5.2*, the esophagus for *muc5.3* and the gut for *muc2.1*<sup>27, 28</sup>.



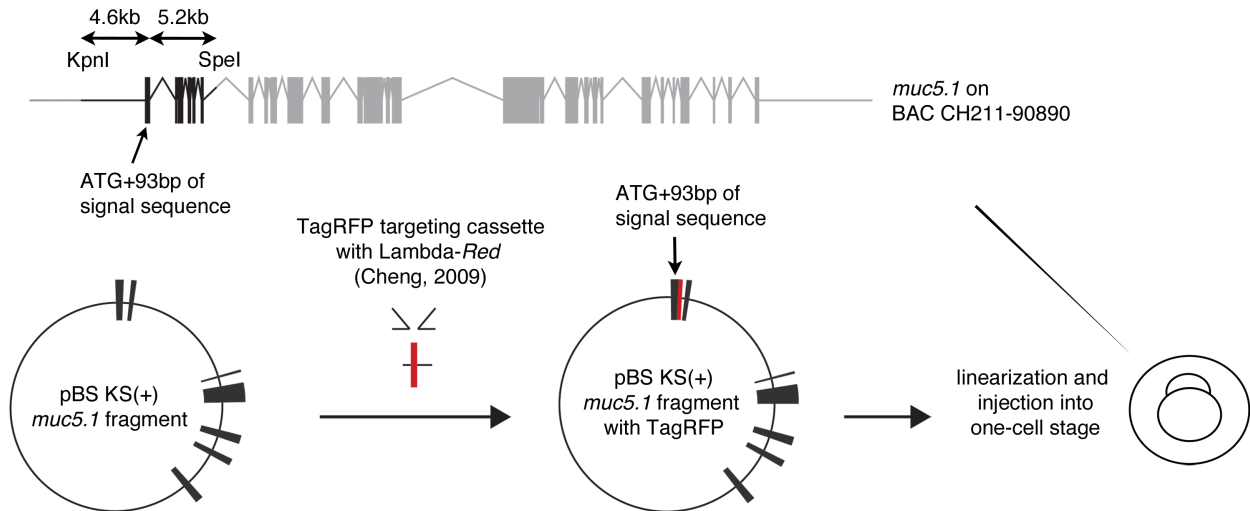

**Supplementary Figure S7.** Generation of the fluorescent mucin reporter *muc5.1:S-RFP*. The reporter consists of the Tag-RFP (Tag-labeled Red Fluorescent Protein) fused in frame with the mucin signaling sequence downstream of the *muc5.1* promoter (S). A 9.8kb KpnI/SpeI fragment, which contains the mucin promoter region and part of the 5' region of *muc5.1*, was excised from BAC CH211-90890 and cloned into the pBSII KS(+) vector. The Tag-RFP targeting cassette was generated with high fidelity PCR and inserted behind the mucin signaling sequence in the first exon by Lambda-Red homologous recombination (see <sup>42, 43</sup> and Methods for details). The resulting construct contains the *muc5.1* promoter region (4.6 kb in the promoter and 5.2 kb in the 5' genomic sequence) and RFP fused in-frame with ATG. RFP is terminated with the stop codon.

**Supplementary Table S1.** Additional mucin-like fragments from the zebrafish genome identified in the bioinformatics searches. Their classification was determined with MrBayes. It appears that the zebrafish genome might contain at least one more *muc5*- and one more *muc2*-like mucin.

| <b>Ensembl ID</b>  | <b>Position</b>           | <b>Genomic size (bp)</b> | <b>Domains</b>     | <b>Mucin family</b> |
|--------------------|---------------------------|--------------------------|--------------------|---------------------|
| ENSDARG00000089256 | Zv9_NA551                 | 13024                    | Cys-knot           | <i>muc5</i>         |
| ENSDARG00000090240 | Zv9_NA551                 | 2222                     | VWD                | <i>muc5</i>         |
| ENSDARG00000060302 | Zv9_NA551                 | 500                      | VWD                | <i>muc5</i>         |
| ENSDARG00000089023 | Zv9_NA447                 | 9544                     | VWD                | <i>unknown</i>      |
| ENSDARG00000076684 | Zv9_NA447                 | 18758                    | VWD                | <i>muc2</i>         |
| ENSDARG00000073938 | Zv9_NA774                 | 22126                    | PTS, VWD, Cys-knot | <i>muc2</i>         |
| ENSDARG00000089990 | chr25:8,583,497-8,592,403 | 8907                     | none               | <i>muc5</i>         |

## Supplementary Addendum S1. Protein sequences of secreted gel-forming mucins in zebrafish used for the construction of the protein domain models.

>danrer\_Muc5.1 | chr25 cluster | IDENTICAL TO ENSEMBL : ENSDARG00000070331 | ENSDART00000153708 | ENSDARP00000127611

MGFDSEGTVRMPQMWMLRWVFLLAGLQSIQAGFMGDYRDMENPMTPMWPTTTPAISMTSVPVITVEPNPDHRSTICST  
WGNFHFKTFDGHFFQLPDTCNVVLAVMCDAASSDFNIQMRETVNGSISFSTVLIKLDGTVIKVTDSDITMGEETVT  
VPTYKNGIKIEGSPTSFKISNKHGVTVFWEEDNSLSIELPEKYQGQTCGLCGDFNGNLADDITDNGPATWKVSI STE  
ICEEVTL PSTGPCDELSEQASFC EEYLI SPGFSGCYDVMDMRI FQKACVSDLCQCYGNHDCLCNTL TEISRQCTHAG  
GQPGTWRTEQLCPKTCPLNLQYLECGGPCRNTCSAPTANLMCTDHCVDGFCFCPEGTVEDDIGQSGCVPVNECPVHD  
GTVYKSGESYQQACKSCTCDAGHWTCTYLD CPGTCSVVGSGSHVTTFDGKSFTFSGNCDYILTKHSADSDFAVVG NLA  
KCEASRTDTCLHSVTLVISGTTISFSSSGDVTLN NINSKELPFSIGPVSIFQPSSSFIIVDLT SVRLEIQLAPVMQL  
YIVASTE EKGMKTGLCGNYNDVQTD DDFKTESGII EGTPTS FVNFWKQNC PDLEITFDN PNC SLNMDTEK LAKDWCSRL  
TNPNGTFSECHSEICPEMYYYQRCVYDTC KCS DIRKICAAVSTYAHACAARGIILHDWMDTEPCESECPENMKHSYE  
VTSCGSTCRSLSGQENTCQGSFTPVHGCVCSEGT YLNEEGKCVHAGMCPCYGNQVIQPSAEFNKEGAKCTC NNGKL  
DCSSHEDCVAPMTFFKCSHPGEGKTECQRTCDKQDPNNCVSTGCVSGCMCPEGLLADGKGGCV MRENCPC THNGVTS  
SPGDQVQQDCNTCTCTNGMWICTQKAC YGTCTIYEGEFRTFDGNRYSFHGDCEHTLAHDYCDGNPSPSFR LVTENI  
PCATANSICSKSINLTFGRYEMILSEDDGVK VVEGNGTEYKYQIN YGGIYV VIEIEGLLNLIWDEKTSVM IQLHPKL  
KGNVCGLCGNFDGNANND FMKHNGEVVTDPEE FGN SWKVD SNCPDVTNVMHPCEAHPHRNSWAIKQCRIITS PVFTD  
CHSLVDSGPYYDACVRDTCACDSGGDCDCLCTAVGAYAAECRKR GACVAWRTPHFCPLFCDY NAPGECQWHYKTCG  
STCMKTCRNPLGTCSDQIPPLEGCF LQCP SERPYLREETMKCVTEEGCKDCFYDGKVYPRGSVIYNTTDGSGACFSA  
KCDYNGEIIREIKTDCIITTT PFTFSTP PSTTTVTITSTETPSTITSTITPTTGTSTPTSTETPITTT SITSPTTETS  
TSTSTETPPTPASTTSPTTETSTSTSTETPSTITSTVTPTTETSTPTSTETVPTPSTTTATTTPTSTTTPI CVPRCE  
WSDWIDSNKP NTEPEGFETESI PLLWNSRRITCQSPEEVECRAVNYPQKTLEDLGQTVYCNTS FGLSCSNEDNAEGL  
PPICYN YEIRVYCKKENCPSDTTSTPSTSTETPSTTTSTTSPTTETSTPTSTETPSTITSTVTPTTGTSTPTSTET  
PPTPASTTSPTTETSTPTSTETPSTTASTTSPTTETSTPTSTETPSTITSTVTPTTETSTPTSTETVPTPSTTTATT  
PTSTTTPI CVPRCEWSDWIDSNKP NTEPEGFETESI PLLWNSKRITCQSPEEVECRAVNYPQKTLEDLGQTVYCNTS  
FGLSCSNEDNAEGLPPICYN YEIRVYCKKENCPSDTTSTPSTSTETPSTTSPTTETLTPTSTETPSTITSTVTPTT  
GTLTPTSTETPSTTASTTSPTTETSTPTSTETPSTTASTTSPTTETSTPTSTETPSTTASTTSPTTETLTPTSTETP  
STITSTVTPTTETSTPTSTETVPTPSTTTATTTPTSTTTPI CVPRCEWSDWIDSNKP NTEPEGFETESI PLLWNSRR  
ITCQSPEEVECRAVNYPQKTLEDLGQTVYCNTS FGLSCSNEDNAEGLPPICYN YEIRVYCKKENCPSDTTPTPSTS  
TETPSTTTSTTSPTTETSTPTSTETPSTITFTITPTTGTSTPTSTETPPTPASTTSPTTETSTPTSTETPSTTASTT  
SPTTETSTPTSTETPSTITSTVTPTTETSTPTSTETVPTPSTTTATTTPTSTTTPI CVPRCEWSDWIDSNKP NTEPE  
GFETESI PLLWNSRRITCQSPEEVECRAVNYPQKTLEDLGQTVYCNTS FGLSCSNEDNAEGLPPICYN YEIRVYCK  
ENCPSDTTPTSTPTSTETPSTTTSTTSPTTETSTPTSTETPSTITFTITPTTGTSTPTSTETPPTPASTTSPTTETS  
TPTSTETPSTITSTVTATSETLPTSTETVPTPSTTTATTA TPTSTTTPI CVPRCEWSDWIDSNKP NTEPEGFETES  
I PLLWNTKRITCQSPEEVECRAVNYPQKTLEDLGQTVYCNTS FGLSCSNEDNAEGLPPICYN YEIRVYCKDNCPSD  
TTTSTPSTSTETPSTTASTTSPTTETSTPTSTETPSTITSTVTPTTGTSTPTSTETPITTT SITSPTTETSTPTSTE  
TPSTTASTTSPTTETSTPTSTETPSTITSTVTPTTETLTPTSTETVPTPSTTTATTTPTSTTTPI CVPRCEWSDWID  
SNKP NTEPEGFETESI PLLWNSKRITCQSPEEVECRAVNYPQKTLEDLGQTVYCNTS FGLSCSNEDNAEGLPPICYN  
YEIRVYCKDNCPSDTTSTPSTSTETPSTTASTTSPTTETSTPTSTETPSTITSTVTPTTGTLTPTSTETPSTITS  
TVTPTTETSTPTSTETVPTPSTTTATTTPTSTTTPI CVPRCEWSDWIDSNKP NTEPEGFETESI PLLWNSRRITCQS  
PEEVECRAVNYPQKTLEDLGQTVYCNTS FGLSCSNEDNAEGLPPICYN YEIRVYCKKENCPSDTTSTPSTSTETPS  
TTTSTTSPTTETSTPTSTETPSTITSTVTPTTGTSTPTSTETPPTPASTTSPTTETSTSTSTETPPTPASTTSPTTE  
TSTSTSTETPSTITSTVTPTTETSTPTSTETVPTPSTTTATTTPTSTTTPI CVPRCEWSDWIDSNKP NTEPEGFETE  
SI PLLWNSRRITCQSPEEVECRAVNYPQKTLEDLGQTVYCNTS FGLSCSNEDNAEGLPPICYN YEIRVYCKKENCPS  
DTTSTPSTSTETPSTTTSTTSPTTETSTPTSTETPSTITSTVTPTTGTSTPTSTETPPTPASTTSPTTETSTSTST  
ETPPTPASTTSPTTETSTSTSTETPSTITSTVTPTTETSTPTSTETVPTPSTTTATTTPTSTTTPI CVPRCEWSDWI  
DSNKP NTEPEGFETESI PLLWNSRRITCQSPEEVECRAVNYPQKTLEDLGQTVYCNTS FGLSCSNEDNAEGLPPICYN  
YEIRVYCKKENCPSDTTSTPSTSTETPSTTTSTTSPTTETSTPTSTETPSTITSTVTPTTGTSTPTSTETPITTT  
SITSPTTETSTPTSTETPSTTASTTSPTTETSTPTSTETPSTITSTVTPTTETLTPTSTETVPTPSTTTATTTPTST  
TTPICVPRCEWSDWIDSNKP NTEPEGFETESI PLLWNSKRITCQSPEEVECRAVNYPQKTLEDLGQTVYCNTS FGLS  
CSNEDNAEGLPPICYN YEIRVYCKKENCPSDTTSTPSTSTETPSTTTSTTSPTTETSTPTSTETPSTITSTVTPTT

GTSTPTSTETPIITTTTSITSPTTETSTPTSTETPSTTASTTSPTTETATPTSTETPSTITSTVTPTTETSTPTSTETV  
PTPSTTTATTTPTSTTTTPICVPKCEWSDWIDSNKPNTEPEGFETESIPLLWNSKRITCQSPEEVEECRAVNYQPQKTL  
DLGQTVYCNTSFLSCLSNEDNAEGLPPICYNIEIRVYCKYNCPSDTTSTPYTSTETPSTTASTTSPTTETSTPTS  
TETPSTITSTVTPTTGTLTPTSTETPSTTASTTSPTIETSTPTSTETPSTITSTVTPTTGTSTPTSTETPIITTT  
SPTTETSTPTSTETPSTTASTTSPTTETPTPTSTETPSTITSTITPTTGTSTPTSTETPIITTTTSITSPTTETSTPTS  
TETPSTTASTTSPTTETATPTSTETPSTITSTVTPTTGTLTPTSTETPSTTASTTSPTTETLTPTSTETPSTITSTV  
TPTTGTSTPTSTETPIITTTTSITSPTTETSTPTSTETPSTTASTTSPTTETSTPTSTETPSTITSTITPTTGTSTPTS  
TETPSTTASTTSPTTETSTPTSTETPSTTASTTSPTTEISTPTSTETPSLGTSTVTPTTGTSAPTSTETPSTTTTSIT  
SPTTETSTPTSTETPSTITSTVTPTTETSTPTSTETTSTTIPVTTIPTETPSTVVTVTTLSTETPSTTVSVTTIPE  
TPSTIVTVTTISTETPSTTVTVTPISTKSPSTIVTATPKSTKTPSITIGSTTTMTEKPSSTSSKSTTTSTKPVTT  
TTKFTVHTGPVRTTPNPEQPSTQCNCYLNAILPLGSSIYNKTDKAGWCFSAHCNSSCSII IQAEP CATTTPPTTTP  
TTTPTTTTTSKPNKNDCTQVQRKNMESWIENCNKYTCCKNGKVT SVPLQCDKSDKVMPTCTNGIKAKKVSYNNGCCSRY  
ECECKCSGWGDPHYQMF DGTYYDFQGNCTYVLFKEIVPRYNI SAYVKNYL CDLQNNLACPEYVIVNYKSYSIKLTSN  
TKEIEVYVNDLQKLT YVNNNFITTS GIGVILNITEINVEITVNHQGFVINLPFSYFSGNTEGQCGVCDNNRTNDC  
RRPDGQIDKSCENMAQLWMVPPGCQPPKPIPKPTPPPVICNPSICEYIKGDMFKECHDHI PYESYYESCKFDVCRM  
NRSIGCTSLEAYAALCGKEGICVDWRTSDDLKQTC A HKCPSHKVYNACGPKVEKTCSTRYNDLFVEKDCQGESCHQT  
YMEGCFCPDNTYLVSTTDYCTAYCDCIGPDGLPREPGDTWTMDCYKYTCNETFGITKEFVGCPTIVPCGPEQKLI  
IDNCCPTCVCNLEVCIHKKCDVGFELAEHANEGSCPPCVPKDVCVYNNT EYQPGSTIYPDPCVECNC DMEKDPETQ  
LHTVSCVSKICEPCSEGFELVEQKGECCGTCKPNACIYVSDNITHILSEGESYNYKCESVTCQQVNGTYIIERTIPT  
CPEINPDQCVPGTLGLDEDGCCNTCELKNCVRVKNM TDVTVNDCKSINPIEVTSCSGNCDTESMYSMGANTMMHSCS  
CCKETKTSVKVTLKCADGSEIPH DYVYIESCRCTPITCENQKTS G

>danrer\_Muc5.2 | chr25 cluster | IDENTICAL TO ENSEMBL ENSDARP00000075869  
ENSDART00000081428 ENSDARG00000058556 comment: missing parts of pts domain  
as compared to genewise result below

CSTWGNFHFKTFDFGHFFQLPDTCNVYLVAVMCDAAISDFNIQMQRD TVNGSISFGSVIVKLDGTVIKITDSGIMDDQ  
VVSVPINQKGIKIEGSPTS IKISRYGMTIFWEEDNSIAIE LAEKYKGLTCGLCGNYNGDKDDMPESGKCHV FVSS  
TWKISTPTESCEDVILPPKDQCDQNTMVCQQYLSSPGFSGCYDVM DMKIFEKACVSDMCQCYGSHDCLCNTL TEISR  
QCTHAGGQPGTWRTEQLCPKMCPI NLQYMECGGPKSTCS DPTAHL MCKDHCVDGFCFCPEGTVEDD IGGGCVPVNE  
CPCVHDGTVYKSGESYQQACKKCFCAAGHWTCTYLDCPGTCSVVG GSHVTTFDGKSFTFSGNCDYILTKHSNDS DFA  
VVG NLAKEPARTDTCLNSVTLVISGTTVSSRFCIL TTLFIVPGVSI FQPSLSFI IADLNSLRLEIQLAPVMQLYI  
VASTE EKGMTGLCGNYNDVQSDDFKTDLGITEGTAISFANFWK KTPYSCPDLENTFDNPCSLSV DTEKLAKDWCSR  
LTNQSGAFSACHSEICPKIYYERC VYDTCKCADIRKICAAVSTYAHACAARGIILQGWMDS DPCSESESEN MKHSY  
GMTGCGLTCRSLSGQENTCQGSFT PVDGCV CSEGTYLNEEGICVPADQCPCYSGDQVTKPSEVSHVDGLTCTCKLGK  
LHCSNPESKFQPCVAPMVLFKCSNYEPGKKGTECQRTCQKQDINNCVSTGCVSGCMCPDNL LADGGGCVEREKPC  
VHNGVTYSSGEQVQEDCNTCTCRNGMWDCTEKECYGTCTIYEGEHFMTFDGKKYSFHGDCEQILVHDYCN TDQSPYS  
LRLVTENIPCGTSGTICSKSINLFFGRYKLILSEEKEIQVVESNGTDYQYQIHTAGIYNVIEVKGLLNL IWDKTSV  
MLQLHPKFKGKVCGLCGNFDGNANND FMKHDGEEVTD PVVFGNSWKS NPGCPDVSNVMNPCEKNPHRS AWAIKQCSI  
ITSPVFS DCHSRVDSGPYYDACVKDTCACDSGGDCDC FCTAVAA YAAECRKTGACVAWRSPSICPLFCDYNNPPSE  
CEWHYKTCGSTCMKTCRNPSGTCSNQIPLLEGCFPQCP SERPFLREDNRKCVTEAECLSLCTYD GKIYTTGDV MYDT  
TDGNGTCFTAVCGSNGEII RSINKSTTT SAPTTPTTPEVTTANTAETPLTETTTTCYCTFANQTFPPGKNV IKTDKA  
GWCYFAYCNSNCVSEITQKPCPQTTT IPLSTV PNDCIDVNKKNGESWNEGCTTKNCINGKVTTSPVQCDSADSDIPT  
CANGLKPEKVVYNNGCCTKYECSCQCSGWGDPHYSTFDGTYVVFQGICDYVLVQEII PRYNI SVHVKNNYCEATNKY  
ACQDSVIVKYKGYEIKLASNTEQIQLNTLSVSVNDVVKVPTFLNEDFSITTSGM AVILNIKEIKSEIVVSHQGFKIN  
LPFSYFKGNTEGQCVCNDNATNDCRRPDGTIDQ SCEQMAALWADSPGESPTPHPSEPIPTCTAQVCEVIKSDLFK  
SCHDIVPYQSYEACKYDVCYKRNDTMACASLEAYAQLCGLKSV CVDWRGSDLLNGQC GYNCGDHKVYQACGPKVEK  
TCSTRYNEMFADNGDQTFMEGCFCPENTYLLSSTTDQCTPTCDCIGPDGLPRQPGDSWVNCTTYKCSSESFGVVQE  
PMNCPKIKPCHEGYKSVIENCCPTCVCDTSLCPMKCDVGYELSEEIPEHHCCPHCVPKDVCVHNNT EYQPGVKI PTE  
PCMECHCHMDKDKDMEDEDRHSLHTVTCVKKCSKGFELVEQEGECCGTCKQKSCIY TAPDNTHTLQPGEVKSHHKC  
ETLTCREIDGVFVTEKIKPKCPDFNPDDCEAGTERFDDDGCKICKPKICIVRKNTTHVNANDCKSISPIEVTSCSG  
HCGTQSMYSMENSIMMHS CCCR EKFVTRQVKLKCADGREIVHDYVYIESCTCTPTKCGSIKT

>danrer\_Muc5.2\_alt\_genewise | chr25 cluster | obtained by genewise alignment  
with muc5.3 protein to chr25 region encoding muc5.2.

VEPKPDHQSRICSTWGNFHFKTFDGHFFQLPDTCNVVLAVMCDAAISDFNIQMQRDTVNGSISFGSVIVKLDGTVIK  
ITDSGIMDDQVVSVPINQKGKIEGSPTS IKISRYGMTIFWEEDNSIAIELAEKYKGLTCGLCGNYNGDKDDDMPE  
SGPATWKIISTPTESCEDVILPPKDQCDQNTMVCQQYLSSPGFSGCYDVMMDKIFEKACVSDMCQCYGSHDCLCNTLT  
EISRQCTHAGGQPGTWRTEQLCPKMCPI NLQYMECGGPKSTCSDPTAHLMCKDHCVDGFCFCPEGTVEDDIGQGGCV  
PVNECPCVHDGTVYKSGESYQQACKKCFCAAGHWTCTYLDCPGTCSVVGSGSHVTTFDGKSFTFSGNCDYILTKHSND  
SDFAVVGNLAKCEPARTDTCLNSVTLVISGTTIGFTSDGVVTLNNGNSPFNLPAVIGPVSIFQPSLSFIIADLNSLRL  
EIQLAPVMQLYIVASTEELKGMTGLCGNYNDVQSDDFKTDLGITEGTAISFANFWKKTTPYSCPDLENTFDNPCSLSV  
DTEKLAKDWC SRLTNQSGAFSACHSEICPKIYYERCYDTCCKADIRKICAAVSTYAHACAARGIILQGWMDS DPC  
ESECS ENMKHSYGMTGCGLTCRSLSGQENTCQGSFTPVDGCVCSSEGTYLNEEGICVPADQCPCYSGDQVTKPSEVSH  
VDGLTCTCKLGLKHLCSNPETCVAPMVLFKCSNYEPGKKGTECQRTCKQDINNCVSTGCVSGCMFDNLLADGQGGC  
VEREKPCVHNGVTYSSGEQVQEDCNTCTCRNGMWDCTEKECYGTCTIYGEHFMFTFDGKKYSCFHGDCEQILVHDYC  
NTDQSPYSLRLVTENIPCGTSGTICSKSINLFFGRYKLI LSEEKEIQVVE SNGTDYQYQIHTAGIYNVIEVKGLLNL  
IWDSKTSVMLQLHPKFKGKVCGLCGNFDGNANNDFMKHDGEEVTD PVVFGNSWKS NPGCPDVSVMNPCEKNPHRSA  
WAIKQCSIITSPVFS DCHSRVDSGPYYDACVKDTCACDSGGDCDCFC TAVAAAYAAECRKTGACVAWRSPSICPLFCD  
YYNNPPSECEWHYKTCGSTCMKTCRNPSGTC SNQIPLLEGCFPCP SERPFLREDNRKCVTEAECLSLCTYDGIY  
TGDVMDYD TTDGNGTCFTAVCGSNGEII RSINKCMTTTTTPTFTTTPPQTPTPSSPETYTSVTAATPSTERPPTSELQR  
PKTTTTTSGPTTKTSQGI STAETPSTVLPLPTSTATTTARTPPPTKTETPSTATTTAAPTPTSPEVTTAVTAETPS  
TGTPPSTTTETPSIATSTAAPTPTAPEVTTAVTAETPSTGTTPPSTKTETPSIATTTAPPTPTAPEVTTAVTAETP  
STEMPLHTTETPSTVTTTAAAPTPTAPEVTTAVTAETPSTGTTPPSTTTETPSIATSTAAQLTPTSPEVTTAVTAETP  
STGTTPPSTKTETPSTATTTAAPTPTAPEVTTAVTAETSSTGTTPPSTKTETPSTATTTAAPTPTAPEVTTAVTAET  
PSTGTTPPSTKTETPSIVTTTAAAPTPTAPEVTTAVTAETPSTGTTPPSTKTETPIIATTTAAPTPTAPEVTTAVTAE  
TPSTEMSLHTPTETPSTVTTTAAAPTPTAPEVTTAVTAETPSTGTTPPSTKTETPSTATTTAAPTPTAPEVTTAVTA  
ETPSTGTTPPSTKTETPSIATTTAAPTPTAPEVTTAVTAKTPSTGTTPPSTKTETPSTATTTAAPTPTATEVTTAVT  
AETPSTGTTPPSTTTETPSIATSTAAPTPTSPEVTTAVTAETPSTGTTPPSTKTETPSTATTTAAPTPTATEVTTAV  
TAETPSTGTTPPSTKTETPSTATTTAAPTPTAPEVTTAVTAETPSTGTTPPSTKTETPSIATTTAAPTPTSPEVTTA  
VTAETPSTGTTPPSTTTETPSTVTTTAAAPTPTAPEVTTAVTPSTEMPLHTTEITETLSTRTPPSTKTETPSTATTT  
APTPTTPEVTTANTAETPLTETTTTCYCTFANQTFPPESVIYNKTDKAGWCYFAYCNSNCVSEITQKPCPQTTT I PL  
STVPNDICDVNKKNGESWNEGCTTKNCINGKVTTSPVQCD SADS IPTC ANGLKPEKVYYNNGCCTKYECSCQCSGW  
GDPHYSTFDGYVYFQIGICDYVLVQEIIPRYNISVHVKNNYCEATNKYACQDSVIVKYKGYEIKLASNTEQIQVSVN  
DVVHVPTFLNEDFSITTSMAVILNIKEIKSEIVVSHQGFKNL PFSYFKGNTGEGQCGVCDNDATNDCRRPDGTIDQ  
SCEQMAALWADSPGCE SPTPHPSEPIPTCTAQVCEVIKSDLFKSCHDIVPYQSYEACKYDVCYKRNDTMACASLEA  
YAQLCGLKSVCVDWRGSDDLNGQCGYNGCDHKVYQACGPKVEKTCSTRYNEMFADNGDQTFMEGCFPCENTYLLSST  
TDQCTPTCDCIGPDGLPRQPGDSWVNVCTTYKCSSESFGVVQEPMNCPKIKPCHEGYKSVIENCCPTCVCDTSLCPM  
KCDVGYELSEEIPEHHCCPHCVPKDVCVHNNTTEYQPGVKIPTPEPCMECHCHMDKDKD

>danrer\_Muc2.2\_chr25\_cluster | chr25 cluster | IDENTICAL TO ENSEMBL  
ENSDARG00000078994 | ENSDART00000112246 | ENSDARP00000098665  
comment: incomplete, without 4th vwd of muc2

ININGSFIPVQRDCLPPQ NITCENHQPSVLLEDKHECCPYVCDFCQGWGDSHYITFDGLYNYQGNCTYILMKEI  
SPQFNLAIIYIENVYCDPAENVSCPRSLIVSYNKQ NITLRSRLMGGANLEALEGNIMLALPYDNNGLRVISSDLNLL  
LEIPKLNAYVLFVGVSGFSINLPFQYFGKNTGEGCGTCNNNQND DDCPGSLANDCKIMAENWNTTVCTPPAPLPTPNSP  
HVHPDCYLLNTT FEACHSHVPPENFFSACQYDSSNPAEVCASLQSYASVCAMFGVCIYWRNYTSQC NIGCSEDKVF  
LPCGSFEPPTCRDRQMESNITVSTEGCFCSQNTTLFTKDSGVCVVPQPCGCLDSSGKPRRFNENFTHNCEDCVCDKAR  
MSV ICEPKKCPDVPVNVCTE PFMVVNVTDPSEPCCSRQVCNCSMCPFSEEKCEVGYELIVHPYGDFCPEIRCESKEV  
CAYNNTEYKPGSKIHVGPCVKCNCEWDPWTELYQMNC SYEVCDDGDFQYMKKDGECGSCVQVACIYDAPDKTTHVL  
QVHLETFTNPHISCMNVTCLKRNDVFTI KEEMKKCPSFNQDDC VEGTKQFDEDGCCPNKICETRNCAPVKNVTRL  
KVVNCTSTEDVEITSCAGHCDKSTL DLHGYYMMNSCSCCQAERSSIREVTLMCEDDWQKWL NIRHNYTYIETCTCTP  
VISGLFQSTFIRS

>danrer\_Muc2.2\_chr25\_cluster\_genewise | chr25 cluster | Same as ENSEMBL  
ENSDARG00000078994, but more complete version obtained by alignment of muc2.1  
to genomic region of ENSDARG00000078994

SSMCSTWESFHFKTFDGDIIYQYPGLCEYNLVS DCTS KQFSVDVKRTQTSSGPKISRIVVSI NGKMF SISENNVMIDD  
QITKLPVYESGILIEENTIYTNIRSKTGLTVMWSKDGAVTVELDNKYQNKTCGLCGNFNRIRDEFITGNTEKIGYIE  
FGNKHKVFNPMFECENPSETDEKNNWKAICGSYQADCEELFRAKAWSSCAMSYPYVDACVYDRCFSSSSLCATLS  
EYSRQCSRNGGTPSTWRTKDFCAVTCPYNTVHFESGSPCIDTCSSENTNTQCEEHNIDGCF CPPGT VFD DILNMGCI  
PREQCHCKHDRIYK PQEELHEVGQDCVCQNGKWNCKIKPVLGRCSVEEGSHFTTFDQGEFTFHGDCTYVLSKDSVGS  
KFIIILGQISPCASLIYDTCLKSIDVIFNSDTVNRLVISEDGTVKHNAAVLLPYTPASRQFVVFSPSSFYILIDTNFG  
LRVLVQLVPLMQVYITMDKRFQGKTHGLCGNFNKLADDMKTPQGLVEGTAVSFANAVEVETNCRSDKSVIPCSHNS  
VSENYAEHWCYKIMDKSDVFAQCHSKVNPESSYKRCKYASCTCERSEDCLCAVFSYVHACMIKNVTLEGWRENVCG  
KYIQNCPPAPQRYFYLLKSCQPTCLSLSSSEHTSCKEDFVVPV DGCACPDGLYKDDQDGCVP I EKCPCYGMGKIAQPGTS  
IDINGQYCVVCVNGVLHCSESEKPHILECPSPKVLFNCSTARPDQHGLKCKPTCMQKIENCF SQTCE SGCLCPSGLLDD  
DRGNCOVERKTCPCPHGGQLYQPETEITVDCNKCTCQSGIWTCTKNKCPGTCTIYGS GHYKIRKIGMYLVIDTNI GLTVL  
WDRKTTIHIILQPEYMGEVCGLCGNFNGDGKDDFTTKGGVQTSNVIEFVDSWKQKTS CPDAAPDFDPCVKNLYREEW  
AVLKCSIIITSDTFKDCQKKVDPTPYDNCLKDTACD TGGDCECLCTAVAAYA QACNEADV CVNWRTPDFCPVYCDY  
YNKPDECTWHYSPCHPPCYKTCLNPSGICNNTLPNLEGCF LTCPDDKPFYDDENQVCVKDCYISTTISTLTTT YTS P  
LPTSSLMPSTTSEIPFTTSITPSTRSNSTFSTISVTTTTQNPSTTSETLSRTSTTPGTTTTIFTTTTSTTTPLTPST  
T

>danrer\_Muc2.1 | Zv9\_NA774 | IDENTICAL TO ENSEMBL ENSDARG00000074142  
| ENSDART00000046576 | ENSDARP00000046575 comment: no 4th vwd domain

VIFAVSPSNHVNSICSMWGNFHFKTFDGDVYQFPGMCEYNLVS DCSLIRQFSIYVKRTERSTGPKISRVSITINDI  
AIELTENQVNVNEAKVTLPVHVS GILVEENTIYTRLYSKMGITVMWNKDDAVMVELDSKYSNRTCGLCGDFNGIPVY  
NEFIQSGRTVGYTEFGNMHRVNPPTHQCEDPFENVDEQNVVDQCEKYRADCADLLEDEKWSSCSWVLDPEAYIKACT  
NDLCNRQPEDEDTTALCATL TEYSRQCSHAGGNPPAWRTAKFCNVQCPYNMVHSESGSPCMDTCSHKDTNALCEEHN  
IDGCF CPPGT VFD D I SDTGC I PAEK CQCKHDRVYSSGEVLRKSEEECYCQEGSWVCMSIPGPGLCAVEEGSHFTTFD  
GKEFTFHGDCNYLLSKDCEESKFIIILGQIVPCFTHETD TCLKSIVVLF DNDKKNPLFIKADGTVQHNAEVS LPYMTA  
DFTVFRPSSFHIILQTVFGLQVQVQLVPLMQVYITVDQSFQGKTCGLCGNFNKLADDLKTPQGVVEGTAVSFANAW  
KAQSNCAADRGERMDDPCSYSDDSEHFAEHWC SKMKDKESLFAQCHATVNPDSYKRCKYSSTCEKSEDC LCTVFSS  
YARQNCPCRSVILEGWREVVC DKYIKDCPASQSYSELYQSCQRTCVSLASERQSCNVDFV PVDGCACPDGLYQDENNL  
CVPMEKPCYHNGQKIHPGKSLTISLSSVCMNGKFHCRSWKTQILGCPSPKVFFNCSTAGPEEYGLECAKTC SHQE  
VDCFSLDCQSGCQCPFGLLDDGRGHCVQPYNCPCKHDGQYAPGSVIVKDCNKICIRWGNWLCSQKKCPGICTIYGS  
GHYKTFDQQRFGFRGDCSYIAAQNKCGNKTGNFHVVTENMPCGTTGTTCSKAVGILLGRTWLLLS DGTVTATDVGTG  
PNIKYNERNVGMYLVIDAAIGLTVLWDRKTTVRIILQPQHMDVCGLCGNFNGNGKDDFTTQGNLPTTNIMEFVDSW  
KVLSTCPDAQPDFDPCSQTPNRETWAKIQCSI I KEVTFKDCHSKVDPNPYENCVKDSCSDTGGDCECFCTAVAAY  
AQACNEAGVCVWVRTPEICPVYCDYYNEPGECTWHYSPCHTPCYKTCLNPDGICNNTLPNLEGCYPEC PEDKPIFDE  
KNQICVEECTPPPPPTTTPVPTTTPVPTTTPVPTTTPVPTTTPVPTTTPVPTTTPVPTTTPVPTTTPVPTTTPVPT  
TTTTVPPTTIPPTTTPVPTTTPVPTTTPVPTTTPVPTTTPVPTTTPVPTTTPVPTTTPVPTTTPVPTTTPVPT  
TTTTATVPPTTTPPEPTTTPPIPTTTEPPKPTTTPPTTTELPPTTTPPEPTTTPPIPTTTT

>danrer\_Muc5.3 | chr7 | IDENTICAL TO ENSEMBL ENSDARG00000089847  
| ENSDART00000148421 | ENSDARP00000124449

XFTTMNLIPTATIE MVAGLTSQHNELICSTWGNHYHYKTFDGDYFQLPSTCNYILTSHCSSSYEDFNVQLRHELLNNE  
PTVSKITMKLQGTIIELSRDSL SVNGQTVTL PYSSAEVFIERVTSYISIKAALGLVAMWNEDDSFMIRLDEKYRNQT  
CGLCGDFNGIPVYNEFVSGGSSLSVSDYGNLWKL DGPTETCTEDTMFLNENCGDENFCRDI FSSPVFSDCRGLVSI  
S FVQVCIQDLCHCNSSGAFCLCDTIAEYSRQCVHAGGKPEEWRTEYFCPHPCPETMVYSQCGNPCTDTCTNSERGQ  
VCAQH CIDGCF CPPGT VYDDIHQSGCI PYTEC SVLGGKIYASGENYTSNCRDCTCDQGWDCYIKDCPHSCSVEGG  
SHITTFDGKAYTFHGDCTYVLSKHCSGTEFTVLGDLVKCLTETETCLKAITVALFDGITVINVDSSGNVEVNRIVA  
QLPLFTSSVSVFKPSSFYIIIEAPLIGLRLEIQLVPIMQLYITANSVYQGETCGLCGNYNNMEADDFTTIGGLREGT  
ALDFANTWKTRASC PDVKRSFENPCSLSTENEQYAHWC SLLSDSSVFAPCHTEVNPEVYKANC IYDSCNCRSED  
CMCAALSSYAHACAARGILLEGWRDAACMKYTETCAATTVYSYQMTSCGRTCRSLSQADGSC THDHVLVDGCGCAEG  
KYMNENGDCVEAAACSCYDSGKVVALGETISKDGGSCICQOGKLS CSGVSNGEECTEPMRFFNCSSASPGSEGAECQ  
KSCNTLDMACISTGCVSGCVCPSGLVSDGNGG CIDKQDQPCIHNGHTYQSGESIKIDCNTCSCQNRRTCTTNQCSA  
TCSIYGDGHYRTFDDKRYVFSGNCEYSLVQDFCNSTSGTFRVITENIPCGSTGTTCSKA IKLFLG SNE LR L TDG SFQ  
VVR RDAGEEIPYQMR TMGLYLV IETKNGLM LIWDRKTTIHIKLGPEYNGRVCGLCGNYDGNANNDFTTRTQAVAVQA

LDFA NSWKLSSCPDATLIQDPCAHNPYREAWAQRQCSIITSSVFSACHSQVDPSPFYDACVRDACACDSGGDYECFC  
TAVTAYAQAACNEAGACVAWRSPKICPLFCDYNNPPGECEWHYKPCGAPCMKTCRNPDEQCSNQI PALEG CYPQCPQE  
QPVFDEEDNMKCVKQEECGCFVDMEHYEVGEQVPTTENCQSCNCSSTGVICFDINACRCQYNNNDTYYYGDI IYHTTD  
GLGGCITGICSVNGTIERSIDPCETTTVPTTSSLIPTPTTTFVVFSTPESTTSEVSYTTKKPEQLTTGTTAEVIQ  
TASTREIKHSTEQQVYVTTKPKSTSLPTTMKKTSESETSTNILTTTMMETS IAPITKTLPTVTDKPWTTLSTQSQSVST  
RQTTEEQTENELTTLETTLSTTRPPKVVTGQTIQPTTATTTVEELTATSPESSTPSSTSVPLRQTSPAISTQP  
TTLTKTTAVPVTTLVSTTVTVESSTELEVSTQSPSSSTTKPIKAETTLSTTTAETPSTTVLVEGSSTVQOPTETSAPS  
ILSTTSKSSTSTETTGVVTTTETVTENELSTSETTMSTTRPPKVVTGQTIQPTTATTTVEELTATSPESSTPSST  
SVPLRKTSPAITSQPTTLTKTTAVPVTTLVSTTVSVESSTEFEVSTQGPSSTTKPIKAETTLSTTTAETPSTTVLV  
EGSSTVQHPTE TSAPSILSTTSKSSTSTETTGVVTTTETVTENELSTSETTLSTTRPPKVVTGQTIQPTTATTTV  
EELTATSPESSTPSSTSVPLRQTSPAISTQPTTLTKTTAVPVTTLVSTTVSVESSTEFEVSTQSPSSSTTKPIKAET  
TLSTTTAAIPSTTFVSVEGSTTVQPSAPSILSTTSKSSTATETTGVVTTTETVTENELSTSEKTLSTTRPPKVVTG  
QTIQPTTATTTVEELTATSPESSTPSSTSVPLRQTSPITSTQPTTVTKTTAVPVTTLVSTTVSVESSTKFEVSTQ  
GPSSTTKPIKAETTLSTTTAETPSTTVLVEGSSTVQOPTETSAPSILSTTSKSSTVTETTGVVTTTETVTENELSTS  
ETTLSTTRPPKVVTGQTIQPTTATTTVEELTATSPESSTPSSTSVPLRQTSPAISTQPTTVTKTTAVPVTTLV  
TTVTVESSTELEVSTQGPSSTTKPIKAETTLSTTTAETPSTTVLVEGSSTVQOPTETSAPSILSTTSKSSTSTETT  
VVTTTETVTENELSTSETTLSTTRPPKVVTGQTIQPTTATTTVEELTATSPESSTPSSTSVPLRQTSPAISTQP  
TTVTKTTAVPVTTLVSTTVSVESSTEFEVSTQGPSSTTKPIKAETTLSTTTAETPSTTVLVEGSSTVQOPTETSAPS  
ILSTTSKSSTVTETTGVVTTSTETVTENELSTSETTLSTTRPPKVVTGQTIPTTTATTTVEELTPSPESSTPSST  
LVPVRQTSPAISTQPTTLTKTTAVPVTTLVSTTVTVESSTEFEVSTQSPSSSTTKPIKAETTLSTTTAETPSTTVLV  
EGSSTVQOPTETSAPSILSTTSKSSTVTETTGVVTTTETVTENELSTSETTLSTTRPPKVVTGQTIQPTTATTTV  
EELTATSPESSTPSSTSVPLRQTSPAISTQPTTLTKTTAVPVTTLVSTTVSVESSTEFEVSTQGPSSTTKPIKAET  
TLSTTTAAIPSTTFVSVEGSTTVQPSAPSILSTTSKSSTVTETTGVVTTTETVTENELSTSETTLSTTRPPKVVTG  
QTIQPTTATTTVEELTATSPESSTPSSTSLPVRQTSPAISTQPTTVTKTTAVPVTTLVSTTVTVESSTEFEVSTQ  
GPSSTTKPIKAETTLSTTTAETPSTTVLVEGSSTVQHPTE TSAPSILSTTSKSSTSTETTGVVTTTETVTENELSTS  
ETTMSTTRPPKVVTGQTIQPTTATTTVEELTATSPESSTPSSTSVPLRQTSPAISTQPTTVTKTTAVPVTTLV  
TTVSVESSTEFEVSTQSPSSSTTKPIKAETTLSTTTAETPSTTVLVEGSSTVQOPTETSAPSILSTTSKSSTVTETT  
VVTTTETVTENELSTSETTLSTTRPPQVVTGQTIQPTTATTTVEELTATSPESSTPSSTSVPLRQTSPAISTQP  
TTVTKTTAVPVTTLVSTTVSVESSTEFEVSTQGPSSTTKPIKAETTLSTTTAETPSTTVLVEGSSTVQHPTE TSAPS  
ILSTTSKSSTVTETTGVVTTTETVTENELSTSETTLSTTRPPKVVTGQTIQPTTATTTVEELTATSPESSTPSST  
SVPLRQTSPAISTQPTTLTKTTAVPVTTLVSTTVSVESSTEFEVSTQGPSSTTKPIKAETTLSTTTAAIPSTTFV  
VEGSTTVQPSAPSILSTTSKSSTVTETTGVVTTTETVTENELSTSETTLSTSRPPKVVTGQTIQPTTATTTVEEL  
MATSPESSTPSSTSLPVRQTSPAISTQPTTLTKTTAVPVTTLVSTTVTVESSTEFEVSTQGPSSTTKPIKAETTL  
TTTAETPSTTVLVEGSSTVQHPTE TSAPSILSTTSKSSTSTETTGVVTTTETVTENELSTSETTMSTTRPPKVVTG  
QTIQPTTATTTVEELTATSPESSTPSSTSVPLKQTSPTITSTQPTTVTKTTAVPVTTLVSTTVSVESSTEFEVSTQ  
SPSSSTTKPIKAETTLSTTTAETPSTTVLLEGSSTVQOPTDTSAPSILSTTSKSSTVTETTGVVTTTETVTENELSTS  
ETTLSTTRPPKVVTTSQTIQPTTATTTVEELTATSPESSTPSSTSVPLRQTSPAISTQPTTLTKTTAVPVTTLV  
TTVSVESSTEFEVSTQSPSSSTTKPIKAETTLSTTTAETPSTTVLVEGSSTVQKPTETSAPSILSTTSKSSTVTETT  
VVTTTETVTENELSTSETTLSTSRPPKVVTGQTIQPTTATTTVEELTATSPESSTPSSTSLPVRQTSPAISTQP  
TTVTKTTAVPVTTLVSTTVTVESSTEFEVSTQGPSSTTKPIKAETTLSTTTAETPSTTVLVEGSSTVQHPTE TSAPS  
ILSTTSKSSTSTETTGVVTTTETVTENELSTSETTLSTTRPPKVVTGQTIQPTTATTTV GELTATSPESSTPSST  
SVPLRQTSPAISTQPTTLTKTTAVPVTTLVSTTVSVESSTEFEVSTQSPSSSTTKPIKAETTLSTTTAETPSTTVLV  
EGSSTVQOPTETSAPSILSTTSKSSTVTETIGVVTTTETVTENELSTSETTLSTTRPPKVVTGQTIQPTTATTTV  
EELTATSPESSTPSSTSVPLRQTSPAISTQPTTLTKTTAVPVTTLVSTTVSVESSTEFEVSTQGPSSTTKPIKAET  
TLSTTTAAIPSTTFVSVEGSTTVQPSAPSILSTTSKSSTVTETTGVVTTTETVTENELSTSETTLSTTRPPKVVTG  
QTIQPTTATTTVEELTATSPESSTPSSTSLPVRQTSPAISTQPTTVTKTTAVPVTTLVSTTVTVESSTEFEVSTQ  
GPSSTTKPIKAETTLSTTTAETPSTTVLVEGSSTVQHPTE TSAPSILSTTSKSSTSTETTGVVTTTETVTENELSTS  
ETTLSTTRPPKVVTGQTIQPTTATTTVEELTATSPESSTPSSTSVPLRQTSPAISTQPTTLTKTTAVPVTTLV  
TTVTVESSTEFEVSTQGPSSTTKPIKAETTLSTTTAAIPSTTFVSVEGSTTVQPSAPSILSTTSKSSTATETTGVV  
TTETVTENELSTSETTLSTTRPPKVVTGQTIQPTTATTTVEELTATSPESSTPSSTSLPVRQTSPAISTQPTTV  
TKTTAVPVTTLVSTTVTVESSTEFEVSTQGPSSTTKPIKAETTLSTTTAETPSTTVLVEGSSTVQOPTETSAPSIL  
TTSKSSTVTETTGVVTTTETVTENELSTSETTLSTTRPPKVVTGQTIQPTTATTTVEELTATSPESSTPSSTSV  
LRQTSPAISTQPTTLTKTTAVPVTTLVSTTVSVESSTEFEVSTQGPSSTTKPIKAETTLSTTTAAIPSTTFVSV  
EGSTTVQPSAPSILSTTSKSSTVTETTGVVTTTETVTENELSTSETTLSTTRPPKVVTGQTIQPTTATTTSEEGTTL  
ETTKSTISPVVTTNVFYFSTSMETS IAPITKTL PFFTLIPVTTDSSLFSTTSEFCCFVNETNFHSGDI IYNVTDGF  
GWCFTAYCDESCNIVKISTSCVTSPPSIPPETTTYSSSSTAGTNEPETIISTNTITEETTPSLPRCDAIDPPRQP  
NEAWWSECQKCECDSTLTVICRPVNCVSPPIITCDKPGQMLITVATVDCCEIQDCTCNSSLCPPTPPQOCQPGFTLT

PVITADACCPEYTCSPMEVVCVQNNVTYQPGSNI PSDDPCTQCLCGQDTPETNLLAPECHSLACMMYCPEETHEYRK  
LPGQCCGECVSTECVVVDHNI TVNIPVNQTWPDDKCLTYRCERNNGVSM PVEIKTVCPAFNPEDCIPGTETLDADG  
CCPTCTLENKCTVQKNSTFVLVSKGCKSSSTPVEITSCSGLCGTSSIIYSAEANALVHSCSCCQETTTSTKEVTLNCPDG  
SNISFSYIYIESCGCKASNCPDQSTNMRRRRRRK

>danrer\_alternative\_Muc5.3 | chr7 | obtained by genewise alignment, may not  
be reliable

HNELICSTWGNHYHYKTFDGDYFQLPSTCNYILTSHCSSSYEDFNVQLRHELLNNEPTVSKI TMKLGQGTIIELSRDSL  
SVNGQVTTL PYSSAEVFIERVTSYIS IKAALGLVAMWNEDDSFMIRLDEKYRNQTCGLCGDFNGIPVYNEFVSGGSS  
LSVSDYGNLWKL DGPTECTEDTMFLNENCGDEYNFCRDI FSSPVFSDCRGLVSI DSFVQVCIQDLCHCNSSSGAFC  
LCDTIAEYSRQCVHAGGKPEEWRTEYFC PHPCPETMVYSQCGNPCTDTCTNSERGVCAQHCIDGCF CPPGSTVYDD  
IHQSGCIPYTECSCVLGGKIYASGENYTSNCRDCTCDQGWDCYIKDCPHSCSVEGGSHITTFDGKAYTFHGDCTYV  
LSKHCSGTEFTVLGDLVKCLTETETCLKAITVALFDGITVINVDSSGNVEVNRIVAQ LPLFTSSSVFVKPSSFYII  
IEAPLI GLRLEIQLVPI MQLYITANSVYQGETCGLCGNYNMEADDFTTIGGLREGTALDFANTWKTRASCPDVKRS  
FENPCSLSTENEQY AQHWCSLLSDSSSVFAPCHTEVNPEVYKANC IYDSCNCERSEDCMCAALSSYAHACAARGILL  
EGWRDAACMKYTETCAATTVYSYQMTSCGRTRCSLSQADGSC THDHVLVDGCGCAEGKYMNENGDCVEAAACSCYDS  
GKVVALGETISKDGGSCICQ QGKLS CSGVSNGEECTEPMRFFNCSSASPGSEGAECQKSCNTLDMACISTGCVSGCV  
CPSGLVSDGNGGC I DKDQCPC IHNGHTYQSGES IKIDCNTCSCQNRRTCTTNQCSATCSI YGDGHYRTFDDKRYVF  
SGNCEYSLVQDFCNSTSGTFRVITENIPCGSTGTTCSKAIKLF LGSNELRLTDGSFQVVRDAGEEIPYQMR TMGLY  
LVIETKNGLMLI IWRKTTIHIKLGPEYNGRVCGLCGNYDGNANNDFTTRTQAVAVQALDFANSWKLS SPCDATLIQD  
PCAHNPYREAWAQRQCSIITSSVFSACHSQVDPSPFYDACVRDACACDSGGDYECFCTAVTAYA QACNEAGACVAWR  
SPKICPLFCDYINPPGECEWHYKPCGAPCMKTCRNPDEQCSNQI PALEGCPQCPQE QPVFDEDNMKCVKQEECGCF  
VDMEHYEVGEQVPTTENCQSCNCSSTGVICEFDINACRCQYNNDTYYYGDI IYHTTDGLGGCITGICSVNGTIERSI  
DPCETTTVPTTSSLI TTPPTTVFVFSSTPEQQVYVTTK PSTSLPTTMKKTSESETSTNILTTTMTESIAPITKTL P  
TVTDKPWTTLSTQSQSVSTRQTTEEQT TENELTTLETTSPESSTPSSTSVPLRQTSPAITSTQPTTLTKTTAVPVT  
TLVSTTVTVESSTELEVSTQSPSSSTTKPIKAETTLSTTTAETPSTTVLVEGSSTVQOPTETSAPSILSTTSKSSST  
ETTGVVTTTETVTENELSTSETTMSTTRPPKVTTTGQTIQPTTTATTTVEELTATSPESTPSSTSVPLRKTSPAIT  
SSQPTTLTKTTAVPVTTLVSTTVSVESSTEFEVSTQGPSSTTKPIKAETTLSTTTAETPSTTVLVEGSSTVQHTPET  
SAPSILSTTSKSSSTSTETTGVVTTTETVTENELSTSETTLSTTRPPKVTTTGQTIQPTTTATTTVEELTATSPEST  
PSSTSVPLRQTSPAITSTQPTTLTKTTAVPVTTLVSTTPSAPSILSTTSKSSSTATETTGVVTTTETVTENELSTSEK  
TLSTTRPPKVTTTGQTIQPTTTATTTVEELTATSPESTPSSTSVPLRQTSPPI TSTQPTTVTKTTAVPVTTLVSTT  
VSVESSTKFEVSTQGPSSTTKPIKAETTLSTTTAETPSTTVLVEGSSTVQOPTETSAPSILSTTSKSSSTVTETTGVV  
TTTETVTENELSTSETTLSTTRPPKVTTTGQTIQPTTTATTTVEELTATSPESTPSSTSVPLRQTSPAITSTQPTT  
VTKTTAVPVTTLVSTTVTVESSTELEQPTETSAPSILSTTSKSSSTSTETTGVVTTTETVTENELSTSETTLSTTRPP  
KVTTTGQTIQPTTTATTTVEELTATSPESTPSSTSVPLRQTSPAITSTQPTTVTKTTAVPVTTLVSTTVSVESSTE  
FEVSTQGPSSTTKPIKAETTLSTTTAETPSTTVLVEGSSTVQOPTETSAPSILSTTSKSSSTVTETTGTTLSTTRPPK  
VTTTGQTI EPTTTATTTVEELTPTSPESTPSSTLVPTTLTKTTAVPVTTLVSTTVTVESSTEFEVSTQSPSSSTK  
PIKAETTLSTTTAETPSTTVLVEGSSTVQOPTETSAPSILSTTSKSSSTVTETTGVVTTTETVTENELSTSETTLST  
RPPKVTTTGQTIQPTTTATTTVEELTATSPESTPSSTSVPLRQTSPAITSTQPTTLTKTTAVPVTTLVSTTVSVES  
STEFEVSTQGPSSTTKPIKAETTLSTTTAETPSTTVLVEGSSTVQHTPETETSAPSILSTTSKSSSTSTETTGVVTTTETVTENELS  
TSETTMSTTRPPKVTTTGQTIQPTTTATTTVEELTATSPESTPSSTSVPLRQTSPAITSTQPTTVTKTTAVPVTTL  
VSTTVSVESSTEFEQPTETSAPSILSTTSKSSSTVTETTGVVTTTETVTENELSTSETTLSTTRPPQVTTTGQTIQPT  
TTATTTVEELTATSPESTPSSTSVPLRQTSPAITSTQPTTVTKTTAVPVTTLVSTTVTVESSTELEVSTQSPSSST  
KPIKAETTLSTTTAETPSTTVLVEGSSTVQHTPETETSAPSILSTTSKSSSTSTETTGVVTTTETVTENELSTSETTMST  
TRPPKPSAPSILSTTSKSSSTVTETTGVVTTTETVTENELSTSETTLSTSRPPKVTTTGQTIQPTTTATTTVEELMAT  
SPESSTPSSTSLPVRQTSPAITSTQPTTLTKTTAVPVTTLVSTTVTVESSTEFEVSTQGPSSTTKPIKETSAPSILS  
TTSKSSSTSTETTGVVTTTETVTENELSTSETTMSTTRPPKVTTTGQTIQPTTTATTTVEELTATSPESTPSSTSVPL  
LKQTSPTITSTQPTTVTKTTAVPVTTLVSTTVSVESSTEFEVSTQSPSSSTTKPIKAETTLSTTTAETPSTTVLLEGS  
STVQOPTDTSAPSILSTTSKSSSTVTETTGVVTTTETVTENELSTSETTLSTTRPPKVTTTSQTIQPTTTATTTVEEL  
TATSPESTPSSTSVPLRQTSPAITSTQPTTLTKTTAVPVTTLVSTTTTLLSTSRPPKVTTTGQTIQPTTTATTTVEE  
LTATSPESTPSSTSLPVRQTSPAITSTQPTTVTKTTAVPVTTLVSTTVTVESSTEFEVSTQGPSSTTKPIKAETTL  
STTTAETPSTTVLVEGSSTVQHTPETETSAPSILSTTSKSSSTSTETTGVVTTTETVTENELSTSETTLSTTRPPKVTT  
GQTIQPTTTATTTVEELTATSPESTPSSTSVPLRQTSPAITSTQPTTLTKTTAVPVTTLVSTTVSTQSPSSSTKPI



KAETTLSTTTAETPSTTVLVEGSSTVQQPTETSAPSILSTTSKSSTVTETIGVVTTTETVTENELSTSETTLSTTRP  
PKVVTGQTIQPTTTATTTVEELTATSPESSPSSTSVPLRQTSPAITSQPTTLTKTTAVPVTTLVSTTVSTQGPS  
STTKPIKAETTLSTTTAAIPSTTFVVEGSTTVQPSAPSILSTTSKSSTVTETTGVVTTTETVTENELSTSETTLST  
TRPPKVVTGQTIQPTTTATTTVEELTATSPESSPSSTSLPVRQTSPAITSQPTTVTKTTAVPVTTLVSTTVVE  
SSTEFEVSTQGPSSTTKPIKAETTLSTTTAETPSTTVLVEGSSTVQHPTETSAPSILSTTSKSSTSTETTGVVTTTE  
TVTENELSTSETTLSTTRPPKVVTGQTIQPTTTATTTVEELTATSPESSPSSTSVPLRQTSPAITSQPTTLTKT  
TAVPVTTLVSTTVTVESSTEFENELSTSETTLSTTRPPKTNLTSNHNSTNNSNKDNCCTSHYTCVHNCNCTQGPS  
TTKPIKAETTLSTTTAETPSTTVLVEGSSTVQQPTETSAPSILSTTSKSSTVTETTGVVTTTETVTENELSTSETTL  
STTRPPKVVTGQTIQPTTTATTTVEELTATSPESSPSSTSVPLRQTSPAITSQPTTLTKTTAVPVTTLVSTTVS  
VESSTEFEVSTQGPSSTTKPIKAETTLSTTTAAIPSTTFVVEGSTTVQPSAPSILSTTSKSSTVKEGTTLETTKST  
ISPVVTTNVFYFVSTSMETSIAPIITKTLPPFTLTI PNVTDFGFWCFTAYCDESCNIVKISTSCVTSPPSPSIPPETTTY  
SSSSTAGTNEPETIISTTNTITEETPSLPRCDAIDPPRQPNEAWWSECQKCECDSQTLTVICRPVNCVSPPIITCD  
KPGQMLITVATVDCCEIQDCTCNSSLCPPTPPQQCPGFTLTPVITADACCPEYTCSPMEVVCVQNTVYQPGSNIPSD  
DPCTQCLCGQDTPETNLLAPECHSLACMMYCPEETHEYRKLPGQCCGECVSTECVVVHDNITVNI PVNQTWQPDDK  
CLTYRCERNNGVSMPEIKTVCPAFNPEDCIPGTETLDADGCCPTCTLENKCTVQKNSTFLVSKGCKSSTPVEITSC  
SGLCGTSSINRYSAEANALVHSCSCCQETTTSTKEVTLNCPDGSNISFSYIYIESCGCKASNCP

**Supplementary Addendum S2.** Protein sequences of gel-forming secreted mucins used for the construction of the phylogenetic trees. Multiple alignment is in FASTA format and covers only the N-terminal part of the secreted mucins including three VWD domains, before the PTS region.

```
>danrer_Muc2.2_alt_genewise
--STWESFHFKTFDGDYIYQYPLGCEYNLVS DCTS--KQFSVDVKRTQ--T
SSGPKISRIVVSINGKMF SISENNVMIDDQ-ITKLPVYESGILIE---EN
TIYTNIRSKTGLTVMWSKDGAVTVELDNKYQNKTCGLCGNFNRIRDEF-I
TGNTEKIGYIEFGNKHKVFNPMFCENPSETDEKNNWKAICGS-----
-----YQADCEELFRAKAWSSCAMSYHP--YVDACVYDRCFSK
-----SSSLCATLSEYSRQCSRNGGTPSTWRTKDFCAVTCPYNTVHFESG
SPCIDTCSSENTNTQCEEHNIDGCF CPPGTVFDDILNMGCIPREQCHCKH
DRIYKQEEELHEVGQDCVCQNGKWNCKIKPVLGRCSVEEGSHFTTFDQGE
FTFHGDCTYVLSKDSVGSK-FIILGQISPCASLIYDTCLKSIDVIFNSDT
VNRLVISEDGTVKHNAAVLLPYTPASRQFVVFSPSSFYILIDT-NFGLRV
LVQLVPLMQVYITMDKRFQGK-----THGLC
GNFNKVLADDMKTPQGLVEGTAVSFANAWEVE-TNC-S-RSDKSVIPCSH
NSVSENYAEHWYKIMDKSDVFAQCHSKVNPESSYKRCKYASCTCERSED
CLCAVFSYVHACMIKNTLEGWRENVCGKYIQNC PAPQRYFYLLKSCQP
TCLSLSSEHTSCKEDFVPVDGACPDGLYKDQDQCVP IEKPCPYGMG-K
IAQPGT SIDINGQYCVVNGV LHCSEKPHIL---ECPSPKVL FNCSTAR
PDQHGLKCKPTCMQKIENC-----FSQTCESGCLCPSGLLDDDRGNCVE
RKDCPCPHGGQLYQPETEITVDCNKCTCQSGIWTCTKNK-CPGTCTIYGS
GHYKTFDNQRFQFGSCSYIAAQDMCG---NRTGIFQVITENIPCGRTGT
TCSKSVFIQFGRVSLHLSDELETQYLME--SGALIR----KIGMYLVIDT
NIGLTVLWDRKTTIHIILQPEYMGEVCGLCGNFNGDGKDDFTTKGGVQTS
NVIEFVDSWKQKTS CPDAAPDFDPCVKNLYREEWAVLKCSIIT--SDTFK
DCQKKVDPTPYDNC LKDTACD TGGDCECLCTAVAAYA QACNEADV CVN
WRTPDFCPVYCDYYNKPDECTWHYSPCHPPCYKTCLNPS-GICN----NT
LPNLEG CFL
```

```
>danrer_Muc2.1
```

--SMWGNFHFKTFDGDVYQFPGMCEYNLVSDCQSLIRQFSIYVKRTE--R  
STGPKISRVSITINDIAIELTENQVNVNEA-KVTLPVHVSIGILVE---EN  
TIYTRLYSKMGITVMWNKDDAVMVELDSKYSNRTCGLCGDFNGIPVYNEF  
IQSGRTVGYTEFGNMHRVNPPTHQCEDPFENVDEQNVVDQCEK-----  
-----YRADCADLLEDEKWS SCSWVLDPEAYIKACTNDL CNRQ  
PEDEDTTALCATLTHEYSRQCSHAGGNPPAWRTAKFCNV-QCPYNMVHSES  
GSPCMDTCSHKDTNALCEEHNIDGCF CPGG-TVFDDISDT-GCIPAEK CQ  
CKHDR-VYSSGEVLRKSEEECYCQEGSWVCMSIPGPGLCAVEEGSHFTTF  
DGKEFTFHGDCNYLLSKDCEESK-FIILGQIVPCFTHETDTCLKSIVVLF  
DNDKKNPLFIKADGTVOHNAEVSLPYMTAD--FTVFRPSSFHIILOQ-VF  
-GLQVQVQLVPLMQVYITVDQSFQ GK-----  
TCGLCGNFNKVLADDLKTPQGVEGTAVSFANAWKAQ-SNCPDRSERMDD  
PCSYSSDSEHFAEHWC SKMKDKESLFAQCHATVNPDSYKRC KYSSCTCE  
KSEDCLCTVFSSYARACAAGVILEGWREVVC DKYIKDCPASQSYSELO  
SCQRTCVSLASERQSCNVDFVPVDGCACPDGLYQDENNL CVPMEKPCYH  
NG-QKIHPGKSLTISLSSVCMNGKFHCRSWKTQILG---CSPKVFVFN  
STAGPEEYGLECAKTC SHQEVDC-----FSLDCQSGCQCPFGLLDDGRG  
HCVQPYNCPCKHGQYYAPGSVIVKDCNKICRWGNWLC SQQK-CPGICT  
IYSGGHYKTFDQQRFGFRGDCSYIAAQNKCG---NKTGNFHVVTENMPCG  
TTGTTCSKAVGILLGRTWLLSDGTVTATDVG--TGNIKYNERNVGMYL  
VIDAAIGLTVLWDRKTTVRIILQPQHMD DVCGLCGNFNGNGKDDFTTQGN  
LPTTNIMEFVDSWKVLSTCPDAQPDFDPCSQTPNRETWAKIQCSI I K--E  
VTFKDCHSKVDPNPYYENCVKDSCSCDTGGDCECFCTAVAAQAQACNEAG  
VCVVWRTPEICPVYCDYYN-EPGECTWHYSPCHTPCYKTCLNPD-GICN-  
---NTLPNLEG CYP

>homsap\_MUC2

--STWGNFHYKTFDGDVFRFPGLCDYNFASDCRGSYKEFAVHLKRGPGQA  
EAPAGVESILLTIKDDTIYLTRHLAVLNGA-VVSTPHYS PGLLIE---KS  
DAYTKVYSRAGLTLMWNREDALMLELDTKFRNHTCGLCGDYNGLQSYSEF  
LSDGVLFSPLEFGNMQKINQPDVVCEDPEEEVAPASCSEHR-----  
-----AECERLLTAEAFADCQDLVPLEPYLRACQQDRCRCP  
GGD-T--CVCSTVAEFSRQCSHAGGRPGNWR TATLCPK-TCPGNLVYLES  
GSPCMDTCSHLEVSSLCEEHRMDGCF CPEG-TVYDDIGDS-GCVPVSQCH  
CRLHGHLYTPGQEI TNDCEQCVCNAGR WVKDLPCPGTCALEGGSHITTF  
DGKTYTFHGDCYYVLAKGDHNS-YALLGELAPCGSTDKQTCLKTVVLLA  
DKKKNVAVFKS-DGSVLLNELQV-NLPHVTASF SVFRPSSYHIMVSM-AI  
GVRLQVQLAPVMQLFVTL DQASQGQ-----V  
QGLCGNFNGLEGGDFKTASGLVEATGAGFANTWKAQ-STCHDKLDWLDDP  
CSLNIESANYAEHWCSLLKKTETPFGRCHSAVDPAEYKRC KYDTCNCQN  
NEDCLCAALSSYARACTAKGVMLWGWREHVCNKDVGSCPN SQVFLYNLTT  
CQQTCRSLSEADSHCLEGFAPVDGCGCPDHTFLDEKGR CVPLAKCSCYHR  
G-LYLEAGDVVVRQEERCVC RDGRLHCRQIRLIGQS---CTAPKIHMDCS  
NLTALATSKPRALSCQT LAAG-----YYHTECVSGCVC PDGLMDDGRGG  
CVVEKECPCVHNNDLYSSGAKIKVDCNTCTCKRGRWVCTQAV-CHGTCSI  
YSGHYITFDGKYDFDGHCSYVAVQDYCG-QNSSLGSFSIITENVPCGT  
TGVTCSKAIKIFMGRTELKLEDKHRVVIQRD--EGHHVAYTTREVGQYLV  
VESSTGIIVIWDKRTTVFIKLAPSYKGTVCGLCGNF DHRSNNDFTTRDHM  
VVSSELDFGNSWKEAPTCPDVSTNPEPCSLNPHRRSWAEKQCSILK--SS  
VFSICHSKVDPKPFYEACVHDS CSDTGGDCECFCSAVASYA QECTKEGA  
CVFWRTPDLCPIFCDYYN-PPHECEWHYEP CGNRSFETCRTINGIHSN--  
--ISVSYLEGCYP

>galgal\_Muc2

--STWGNHFHFKTFDGDIIYQFPGMCEYNFVSDCQDSYREFSVHIQRALNSN  
NHPE-IQYILITVTDFTVYLKPKLAVVDGR-IVKTPYYSSGLLIE---SN  
DIYTKVYAKLGLIL IWNQEDALMVVELDSKFGNQTCGLCGDYNGVPIYNEF

ISGVASYNSITYGNLQKISKPNDECEDPDETRALPSCNEHVSKPNCELRF  
PGCMETSLHCEMLREECEKLLTSSAFADCHSRNLNLEMYIQACMQDKCACK  
GNE-DSFCLCSTISEYSRQCSHAGGRPG-----  
-----TVYDDITEN-GCIPVSQCS  
CRLHGKGYSPGETITNECEEECTCDSGRWTCKDLPCPGTCSVEGGSHIKTF  
DGKKYTFHGDCYVVLAKSAVNDT-HALLAELAPCGSSDGTCLKTVVLLV  
DDKKNVVVFRS-DGSVSLNEMTV-NVPHVSASFVFKPSSYYLIVHT-SF  
GLQLQIQLSPVMQLFVTADQSVQDIQKCKPLKQEAQPCISTAVKSYILYM  
GGLCGNFNGMEGDDFKTTNGLVEATGSAFANTWKAQ-PTCADQAEKLEDP  
CTLSIESANYAEHWCSLLKNSEGPFARCHSVIDPAEYKRCRKYDTCLCKD  
NEECLCAALSSYSRACAFKGIILGGWRQSVCSDEVSACPGNQVFLYNLTM  
CQOTCRSIADGEKYCLQDFAPVDGCGCPDNTYLDNQDTCVPI SKCPCYK  
G-SYLEPGEYVTKDGERCVCRNAKIRCTSVTMRMKSITECPSNKTYFDCN  
ASPDWTSRTPVQLRCGTSQTD-----LYQGECVSGCVCPEGLFDDGRGG  
CVEEEDCPCIHNSDWNHQSITVDCNTCTCQKGIWSTKNV-CYGTCTMI  
YGSYHYITFDGKFDYDFDGSCEYVATQ-----  
-----KTELKLENKDYKEIQRD--VGDDVHYQNKTVGLYLV  
IEASNGVMLIWDKKTTFVIFIKLTPDYKGVKVCGLCGNFDDKANNDFTSRNGL  
QETNALTFGNSWKQSSVCPDVTTEEIKPCDLKPHRKSWAEEKESLIL--SE  
IFKICHSKVNPSPFYDACVHDACSCDSGGDCDCFCSAVAAYAQECTKAQA  
CVFWRSPDICPIFCDYIN-PRNECEWHYPCGS-NVMTCRMLYNVSTN--  
--FSVPYLEGCYP

>homsap\_MUC5AC

--STWGSFHYKTFDGDVFRFPGLCNYVFSEHCGAAYEDFNIQLRRSQ--E  
SAAPTLSRVLKMKVDGVVIQLTKGSVLVNGH-PVLLPFSQSGVLIQ---QS  
SSYTKVEARLGLVLMWNHDDSLLELDTKYANKTCGLCGDFNGMPVSEL  
LSHNTKLTPEFNGLNQKMDDPTEQCQDPVPEPRNCSTGF-----  
-----GICEELLHGQLFSGCVALVDVGSYLEACRQDLCFCE  
DTD-LLSCVCHTLAEYSRQCTHAGGLPQDWRGPDFCPQ-KCPNNMQYHEC  
RSPCADTCSNQEHSRACEDHCVAGCFCEG-TVLDDIGQT-GCVPVSKCA  
CVYNGAAYAPGATYSTDCTNCTCSGGRWSCQEVPCPDTCSVLGGAHFSTF  
DGKQYTVHGDSCSYVLTKPCDSSA-FTVLAE LRRCGLTDSETCLKSVTSL  
DGAQTVVVIKA-SGEVFLNQIYT-QLPISAANVTIFRPSTFFIIAQT-SL  
GLQLNLQPVPTMQLFMQLAPKLRGQ-----T  
CGLCGNFNSIQADDFRTLSGVVEATAAAFFNTFKTQ-AACPNI RNSFEDP  
CSLSVENEKYAQHWCSQLTDADGPFGRCHA AVKPGTYYSNCVFDTNCER  
SEDCLCAALSSYVHACAAGVQLGGWRDGVCTKPMTTCPKSMTYHYHVST  
CQPTCRSLSEGDI TCSVGFIPVDGCI CPKGTFLDDTGKCVQASNCPCYHR  
G-SMIPNGESVHDSGAICTCTHGLKSCIGG-QAPAP--VCAAPMVFFDCR  
NATPGDTGAGCQKSCHTLDMT-----CYSPQCVPGCVCPDGLVADGEGG  
CITAEDCPCVHNEASYRAGQ TIRVGCNTCTCDSRMWRCTDDP-CLATCAV  
YGDGHYLTFDGQSYSFNGDCEYTLVQNHCGGKDSTQDSFRVVTENVPCGT  
TGTTCSKAIKIFLGGFELKLSHGKVEVIGTD--ESQEVPTYIQMGIIYLV  
VDTDIGLVLLWDKKT SIFINLSPEFKGRVCGLCGNFDDIAVND FATRSRS  
VVDVLEFGNSWKLSPSCP DALAPKDPCTANPFRKSWAQKQCSILH--GP  
TFAACHAHVEPARYYEACVNDACACDSGGDCECFCTAVAAYAQA CHEVGL  
CVCLRTPSICPLFCDYIN-PEGQCEWHYQPCGVPLRTRCRNPRGDCL---  
--RDVRGLEGCYP

>homsap\_MUC5B

--STWGD FHYKTFDGDVFRFPGLCNYVFSEHCRAAYEDFNVQLRRGL--V  
GSRPVVTRVVIKAQGLVLEASNGSVLINGQ-REELPYSRTGLLVE---QS  
GDYIKVSIRLVLTFLWNGEDSALLELDPKYANQTCGLCGDFNGLPAFNEF  
YAHNARLTPLQFGNLQKLDGPTEQC PDPLPLPAGNCTDEE-----  
-----GICHRTLLGPAFAEHALVDSTAYLAACAQDLCRCP  
-----TCPCATFVEYSRQCAHAGGQPRNWRCPELCPR-TCPLNMQHQEC

GSPCTDTC SNPQRAQLCEDHCVDGCFPPGSTVLDDITHS-GCLPLGQCP  
CTHGGRTYSPGTSFNTTCSSTCSGGLWQCQDLPCPGTCSVQGGAHISTY  
DEKLYDLHGDCSYVLSKKCADSS-FTVLAELRKCGLTDNENCLKAVTSL  
DGGDTAIRVQA-DGGVFLNSIYT-QLPLSAANITLFTPSSFFIVVQT-GL  
GLQLLVQLVPLMQVFVRLDPAHQGQ-----M  
CGLCGNFNQADDFALTSGVVEATGAAFANTWKAQ-AACANARNSFEDP  
CSLSVENENYARHWC SRLTDPNSAFSRCHSIINPKPFHSNCMFDTNCER  
SEDCLCAALSSYVHACAAGVQLSDWRDGVCTKYMQNCPKSQRYAYVVDA  
CQPTCRGLSEADVTC SVSFVPVDGCTCPAGTFLNDAGACVPAQECPCYAH  
G-TVLAPGEVVHDEGAVCSCTGGKLSCLGASLQKST--GCAAPMVYLDSC  
NSSAGTPGAECLENSCHTLDVG-----CFSTHCVSGCVCPGLVSDGSGG  
CIAEEDCPCVHNENATYKPGETIRVDCNTCTCRNRREWC SHRL-CLGTCVA  
YGDGHFITFDGDRYSFEGSCEYILAQDYCG-DNTTHGTFRIVTENIPCGT  
TGTTCSKAIKLFVESYELILQEGTFKAVARG--PGGDPPYKIRYMGIFLV  
IET-HGMAVSWDRKTSVFIRLHQDYKGRVCGLCGNFDDNAINDFATRSRS  
VVGDALEFGNSWKLSPSCP DALAPKDPCTANPFRKSWAQKQCSILH--GP  
TFAACRSQVDSTKYEEACVNDACACDSGGDCECFCTAVAAYAQAACHDAGL  
CVSWRTPDTCPLFCDFYN-PHGGCEWHYQPCGAPCLKTCRNPSGHCL---  
--VDLPGLEG CYP

>galgal\_Muc5AC

--STWGNFHFKNFDGDIIFYFPVCNYIFASNCKSPYEDFNIQIRRTM--V  
ENATVITHVIMRLEGAVVELTRTSVLVNGK-QIQMPYSHMGVLIE---RS  
NSYIKVS AKLGLTFLWNEEDALLVELDKKYANQTCGLCGDFNGIPTNNEF  
ISQNAKLTAVQFGNRQKIDGPTQCDDPIPSAVLMNCSSEF-----  
-----ASICKTVLTSEAF TSCNALVDVQDYIDT CIQDLCHCD  
TSM-ADFCMCNTFAEYSRQCAHAGGQPLNWR TSEL C-----  
-----RMVFDDINGA-GCIPRKECH  
CTYEGETYAPGTSFSSKCRSCTCAGGEWTCVTQSCPATCSIEGGSHITTY  
DEKYYSFYGDCSYVLT KLCDNSD-FTVLGDIHKCGLTDTETCLKGVAISL  
SGGQTNIVIQP-SGSVFNMIYT-QLPFSANVTIFRPSSFFIILQT-TF  
GLQLQIQIVPLMQLFINLDPSQKQ-----T  
CGLCGNFNDIQTDDFKTTSGVIEGTSAAFGNTWKTR-ADCPDAKITFENP  
CTLSIENDKYAQHWCGLLSDTTGPFAECHSTVNPEVYQKNCMFDTNCEN  
TEDCMCAALSSYVRACAAGILLNGWRNKVCTKYTNTCPKSLEYTYNVDS  
CQPTCRSLSEP DVTCNIKIFVPVDGCTCVNGTYMDES GKCVPAASCPCYYK  
G-MPLSTGEVIHDNGVVCTCSYGKLS CIGE--KPPP--VCAPPMVYVDCG  
NATAGVTGAECQKSCQTL DME-----CYKTHCVSGCICPPNYVSDGKGG  
CIAAEECPCVHNGDSYRPGESIRVGCNNCTCRNRKWHCSEEP-CLETCSV  
YGDGHYTTFDGKRDFEGDCEYVLIQNYCGRKGLNQGTFRVITENIPCGT  
TGTTCSKSIKVLFLGNYELVLSDGHS DVIQRS--PGGEMPFQIRSMGIYMV  
VDTTVGLILMWDKKT SIFIKLSPSFQGHVCGLCGNYDGNNGNDF TTRSQS  
VVGNVLEFANSWKVSSTCPNANQTKPCTANPYRKS WAQKQCSIIT--SEV  
FAKCHSQVEPNEY YQACVDDACACDTGGDCECFCTAVAAYAQAACNELDIC  
ISWRTPSICPLFCDYIN-PQGECEWHYKPCGAPCMKTCNNPSGKCL----  
-HELRGLEG CYP

>galgal\_Muc5B

--CTWGNFHFKTFDGDIFRYPGLCNVVFASHCNAPYEEFNIQIRRTL--V  
ENILTIHRIA IKLEGVAIELTKDVVLINSN-RVQLPYSQAGITIE---RS  
SIYVKVSKTDIVFMWNQRDSILLELHEKYANQTCGLCGDFNGIPVYNEF  
YSNNIRMTALQFGNMQKMDGPT EYCEDPTPSSLDN-----  
-----  
-----  
-----  
CTYN-----  
---FH-----CEDEI-FTILVELRKC GMTNTETCLKTVTLSM

NKGQTLIEVKT-DGGVFMNSIYT-QLPISAANVTIFRPSSFFVIMHT-NI  
GIQVEIQITPIMQVFRVRLDPVFKDQ-----T  
CGLCGNFNNVQTDFFKAI SGVVEGTAAAFANTWKTQ-ASCPDIQSSFENP  
CALSIDNEKYAKHWCGLLTNSEGPFADCHYLLNPSTYYTNCMFDTCCNCQN  
SEGCLCAALSSYVRACAARGIQINGWRNTVCSKYTTSCPKSLSYSYTINS  
CQPTCRSLSEPVDVTKIKFVVDGCTCVNGTYMDES GKCV PANECPCYYR  
G-SPIPLGEVVHENGLVCT-----  
-----QCVSGCVCPSGLVLDGKGG  
CIPEEEPCPIHNGAMYQPGEKINADCNTCVCKDRMWECTKKQ-CLGTCAV  
YGDGHYTTFFDDQRFSGNCEYTLVQNHCGKSDTVNGTFQVITENIPCGS  
TGTTCSKSIKVFLEHYELVLESEERSVVIKRG--QDGEVPFTVRYIGMYTV  
IDTTSGLILMWDKKTSTIFIKLSPEFKGQICGLCGNYDGNGINDFTTRSLS  
VVENVLEFGNSWKVSTCPDASFVKDPCSTNPYRKSWSSEKQCSIIN--SN  
VFAACHSQVEPAKYQACVTDACACDSGGDCDCFCCTAVAAAYAQACNEVGV  
CIAWRTPSIC-----  
-----RCYP

>danrer\_Muc5.3

--STWGNHYHKTDFGDYFQLPSTCNYILTSHCSSSYEDFNVQLRHEL--L  
NNEPTVSKITMKLQGTIIELSRDLSVNGQ-TVTLPYSSAEVFIE---RV  
TSYISIKAAALGLVAMWNEDDSFMIRLDEKYRNQTCGLCGDFNGIPVYNEF  
VSGGSSLSVSDYGNLWKL DGPTECTEDTMFLNENCGDEN-----  
-----FCRDIFSSPVFSDCRGLVSI DSFVQVCIQDLCHCN  
SSS-GAFCLCDTIAEYSRQCVHAGGKPEEWRTEYFCPH-PCPETMVYSQC  
GNPCTDCTNSERGVCAQHCIDGCF CPPG-TVYDDIHQS-GCIPYTECS  
CVLGGKIYASGENYTSNCRDCTCDQGWDCYIKDCPHSCSVEGGSHITTF  
DGKAYTFHGDCTYVLSKHCSGTE-FTVLGDLVKCGLTETETCLKAITVAL  
FDGITVINVDS-SGNVEVNRIVA-QLPLFTSSVSVFKPSSFYIIIEAPLI  
GLRLEIQLVPI MQLYITANSVYQGE-----T  
CGLCGNYNNMEADDFTTIGGLREGTALDFANTWKTR-ASCPDVKRSFENP  
CSLSTENEQYQAQHWCSSLSDSSSVFAPCHTEVNPEVYKANCYDSCNCER  
SEDCMCAALSSYAHACAARGILLEGWRDAACMKYTETCAATTVYSYQMTS  
CGRTCRSLSQADGSC THDHLVDGCGCAEGKYMNENGDCVEAAACSCYDS  
G-KVVALGETISKDGGSCICQQGKLS CSG--VSNGE--ECTEPMRFFNCS  
SASPGSEGAECQKSCNTLDMA-----CISTGCVSGCVCPSGLVSDGNGG  
CIDKDQPCPIHNGHTYQSGESIKIDCNTCSCQNRRTCTTNQ-CSATCSI  
YGDGHYRTFFDDKRYVFSGNCEYSLVQDFCN--STSGTFRVITENIPCGST  
GTTCSKAIKFLGSNELRLTDGFSFQVRRD--AGEEIPYQMRMTGLYLVI  
ETKNGMLMIWDRKTTIHIKLGPEYNGRVCGLCGNYDGNANNDFTTRTQAV  
AVQALDFANSWKLS-SCP DATLIQDPCAHPYREAWAQRQCSIIT--SSV  
FSACHSQVDPSPFYDACVRDACACDSGGDYECFCTAVTAYAQACNEAGAC  
VAWRSPKICPLFCDYIN-PPGECEWHYKPCGAPCMKTCRNPDEQCS----  
-NQIPALEGCYP

>danrer\_Muc5.1

--STWGNFHFKTDFDGHFFQLPDTTCNYVLAVMCDAASSDFNIQMRET--V  
NGSISFSTVLIKLDGTVIKVTDSDITMGEE-TVTVPTYKNGIKIE---GS  
PTSFKISNKHGVTVFWEEDNSLSIELPEKYQGQTCGLCGDFNGN-LADDI  
TDNGP-----ATWKVSI STEICEEVTL PSTGPCDELSEQ-----  
-----ASFCEEYLISPFGSGCYDVMDMRI FQKACVSDLCQCY  
GN---HDCLCNTL TEISRQCTHAGGQPGTWRTEQLCPK-TCPLNLQYLEC  
GGPCRNTCSAPTANLMCTDHCVDGCF CPEG-TVEDDIGQS-GCVPVNECP  
CVHDGTVYKSGESYQACKSCTCDAGHWTCTYLDCPGTCSVVGSHVTTF  
DGKSFTFSGNCDYILTKHSADSD-FAVVGNLAKCEASRTDTCLHSVTLVI  
SG--TTISFSS-SGDVTLNNINSKELPFSIGPVSI FQPSSSFIIVDL--T  
SVRLEIQ LAPVMQLYIVASTE EKGK-----M  
TGLCGNYNDVQTDFFKTESGII EGTPTS FVNFWKQN---CPDLEITFDNP  
CSLNMDTEKLAKDWC SRLTNPNGT FSECHSEICPEMYYQRCVYDTCKCSD

IRKCI CAAVSTYAHACAARGI I LHDWMD--TEPCESECPENMKHSYEVT  
CGSTCRSLSGQENTCQGSFTPVHGCVCSEGYLNEEGKCVHAGMCPCYYG  
N-QVIQPSAEFNKEGAKCTCNNGKLDSSH-----E--DCVAPMTFFKCS  
--HPGEGKTECQRTCDKQDPNN-----CVSTGCVSGCMCPEGLLADGKGG  
CVMRENCPCPTHNGVTSSPGDQVQDCNTCTCTNGMWICTQKA-CYGTCTI  
YGEHFRTFDGNRYSFHGDCEHTLAHDYCD-GNPSP-SFRLVTENIPCAT  
ANSICSKSINLFFGRYEMILSEDDGVKVVVEG--NGTEYKYQINYGGIYVV  
IEIEGLLNLIWDEKTSVMIQLHPKLGKGNVCGLCGNFDGNANNDFMKHNGE  
VVTDPPEEFGNSWKVDSNCPDVTNVMHPCEAHPHRNSWAIKQCRIIT--SP  
VFTDCHSLVDSGPYYDACVRDTCACDSGGDCDCLCTAVGAYAAECRKRGA  
CVAWRTPHFCPLFCDYIN-APGECQWHYKTCGSTCMKTCRNPLGTCS---  
--DQIPPLEGCFL

>danrer\_Muc5.2

--STWGNFHFKTFDGHFFQLPDTCNVVLAVMCDAAISDFNIQMQRDT--V  
NGSISFGSVIVKLDGTVIKITDSGIMDDQ-VVSVPINQKGIKIE---GS  
PTSIKIS-RYGMTIFWEEDNSIAIELAEKYKGLTCGLCGNYNGD-KDDDM  
PESGP-----ATWKISTPTESCEDVILPPKDQCDQN-----  
-----TMVCQQYLSSPGFSGCYDVMMDKIFEKACVSDMCQCY  
GS---HDCLCNTLTEISRQCTHAGGQPGTWRTEQLCPK-MCPINLQYMEC  
GGPCKSTCSDPHTAHLMCKDHCVDGCFCEG-TVEDDIGQG-GCVPVNECP  
CVHDGTVYKSGESYQQACKKCFCAAGHWTCTYLDPCGTCSVVGSHVTTF  
DGKSFTFSGNCDYILTKHSNDS-FAVVGNLAKCEPARTDTCLNSVTLVI  
SG--TTIGFTS-DGVVTLNGNSPFNLPAVIGPVSIFQPSLSFIIADL--N  
SLRLEIQ LAPVMQLYIVASTEKEGK-----M  
TGLCGNYNDVQSDDFKTDLGITEGTAISFANFWKKT PYSCPDLNFDNP  
CSLSVDTEKLAKDWC SRLTNQSGAFSACHSEICPKIYYERCYDTC CAD  
IRKCI CAAVSTYAHACAARGI I LQGWMD--SDPCESECS ENMKHSYGMTG  
CGLTCRSLSGQENTCQGSFTPVHGCVCSEGYLNEEGICVPADQCPCYSG  
D-QVTKPSEVSHVDGLTCTCKLGLKHCNP-----E--TCVAPMVLFKCS  
NYEPGKKGTECQRTCQKQDINN-----CVSTGCVSGCMCPDNLADGQGG  
CVEREKPCVHNGVTYSSGEQVQEDCNTCTCRNGMWDCTEKE-CYGTCTI  
YGEHFMTFDGKKYSFHGDCEQILVHDYCN-TDQSPYSLRLVTENIPCGT  
SGTICSKSINLFFGRYKLILSEEKEIQVVES--NGTDYQYQIHTAGIYNV  
IEVKGLLNLIWDSKTSVMLQLHPKFKGKVCGLCGNFDGNANNDFMKHDGE  
EVTDPVVFNGNSWKSNPGCPDVSVMNPCEKNPHRSAWAIKQCSIIT--SP  
VFS DCHSRVDSGPYYDACVKDTCACDSGGDCDCFC TAVAAYAAECRKTGA  
CVAWRSPSICPLFCDYINNPSECEWHYKTCGSTCMKTCRNPSGTCS---  
--NQIPLLEGCFP

>homsap\_MUC6

--STWAGHFSTFDHVVYDFSGTCNYIFAATCKDAFPTFSVQLRRGP---  
--DGSISRIIVELGASVVTVSEAIISVKDIGVISLPTYT S NGLQITPFGQS  
VRLVAKQLELELEVWGPDSHLMVLVERKYMGMCGLCGNFDGKVTNEFV  
SEEGKFLEPHKFAALQKLD DPGEICTFQDIPSTHVRQAQH-----  
-----ARICTQLLT---LVAPECSVSKEPFVLSQADVAAP  
QPG-PQNSSCATLSEYSRQCSMVGQPVRRWRSPGLCSVGQCPANQVYQEC  
GSACVKTC SNPQHS--CSSCTFGCFCEG-TVLNDLSNNHTCVPVTQCP  
CVLHGAMYAPGEVTIAACQTCRCTLGRWVCTERPCPGHCSLEGGSFVTTF  
DARPYRFHGTCTYILLQSPQLPEDGALMAVYDKSGVSHSETSLVAVVYLS  
RQDKIVISQDE----VVTNNGEAKWLPYKTRNITVFRQTSTHLQMAT-SF  
GLELVVQLRPIFQAYVTVGPQFRGQ-----T  
RGLCGNFNGD TDDFTTSMGIAEGTASLFVDSWRAG--NCPAALERETDP  
CSMSQLNKVCAETHCSMLLRTGTVFERCHATVNPAPFYKRCVYQACNYEE  
TFPHICAALGDYVHACSLRGVLLWGRSS-VDNCTIPCTGN TTFSYNSQA  
CERTCLSLSDRATECHHSAPVDGCNCPDGTYLNQKGECVRKAQCPCILE  
GYKFILAEQSTVINGITCHCINGRLSCPQR--PQMFLASCQAPKTFKSCS

QSSSENKFGAACAPTQCMLATG----VACVPTKCEPGCVCAEGLYENADGQ  
CVPPEECPCEFGSVSYPGGAELHTDCRTCSCSRGRWACQQGTHCPSTCTL  
YGEHGVITFDGQRFVFDGNCEYILATDVCG-VNDSQPTFKILTENVICGN  
SGVTCRAIKIFLGGLSVVLADRNYTVTGEEPHVQLGVTPGALS LVVDIS  
IPGRYNLTLIWNRHMTILIRIARASQDPLCGLCGNFNGNMKDDFETR SRY  
VASSELELVNSWKESPLCGDVSFVTDPCSLNAFRRSWAERKCSVIN--SQ  
TFATCHSKVYHLPYYEACVRDACGCDSSGGDCECLCDAVAAYAQA CLDKGV  
CVDWRTPAFCPIYCGFYNTHTQDGHG-EYQYTQEANCTWHYQPCLCPSQP  
QSVPGSNIEGCV-

>galgal\_Muc6

--STWGGGHFSTFDKYQYDFTGTCNYIFATVCDDESSPDFNIQFRRGL---  
--DKKIARI I IELGPSVI IVEKDSISVRSVGVIKLPYASNGIQIAPYGRS  
VRLVAKLME MELVVMWNNEDYLMVLTEKKYMGKTCGMCGNYDGYELNDFV  
SE-GKLLD TYKFAALQKMDDPSEICLSEEISIPAI PHKKY-----  
-----AVICSQLLN---LVSPTCSVPKDG FVTRCQLDMQDCS  
EPG-QKNCTCSTLSEYSRQCAMSHQVVFNWRTENFC SVGKCSANQIYEEC  
GSPCIKTC SNPEYS--CSSHCTYGCFCPEG-TVLDDISKNRTC VHLEQCP  
CTLNGETYAPGDTMKAACRTCKCTMGQWNCKELPCPGRC SLEGGSFVTTF  
DSRSYRFHGVCTYILMKSSSLPHNGTLMAIYEKSGYSHSETSLSAI IYLS  
TKDKIVISQNE----LLTDDDELKRLPYKSGDITIFKQSSMFIQMHT-EF  
GLEL VVQTS PVFQAYVKVSAQFQGR-----T  
LGLCGNYNGDTTDDFMTSMDITEGTASLFVDSWRAG--NCLPAMERETDP  
CALSQLNKISAETHCSILTKKGTVFETCHAVVNPTPFYKRCVYQACNYEE  
TFPYICSALGSYARTCSSMGLILENWRNS-MDNCTITCTGNQTF SYNTQA  
CERTCLSLSNPTLECHPTDIPIEGCNC PKGMYLNHNKNECVRKSHCPCYLE  
DRKYILPDQSTMT-----ESC KAPKKYISCS  
DSLENKYGATCAPTCQMLATG----IECIPTKCESGCV CADGLYENLDGR  
CVPPEECPCEYGGLSYKGEQIQTECEICTCRKGKWKCVQKSRCSSTCNL  
YGEHITTFD GQRFVFDGNCEYILAMN-----  
-----LTIILRDETYISGKNLQVKYNVKKNALHLMFDII  
IPGKYNMTLIWNKHMNF FIKISRETQETICGLCGNYNGNMKDDFETR SKY  
VASNELEFVNSWKENPLCGDVYFVVDPCSKNPYRKAWAEKTC SIIN--SQ  
VFSACHNKVNRPYYEACVRDSCGCDIGGDCECMCDIAVYAMACLDKGI  
CIDWRTPEFCPVYCEYYNSHRKTGSGGAYSYGSSVNCTWHYRPCNCPN--  
QYYKYVNIEGCV-

**Supplementary Addendum S3.** Sequences of transcripts obtained by RT-PCR and sequencing to verify the expression of mucin genes. The primers used for amplification of each transcript are also shown.

***muc5.1***

F1- IJ1 – tgacatgggttgaaagcaaa

R1 – IJ4 – tgggtggttgaaaatgtga

TGACATGGGTTGAAAGCAAAC TAAGAGACATTATAAATAGACA ACTGTTAGCAGATGACTCACATTAGCTCTTGAGG  
ATGGGTTTTCGACTCTGAGGGGACGGTCAGGATGCCCCAGATGTGGATGCTGAGATGGGTCTTCTACTGGCCGGGCT  
GCAGTCCATACAAGCAGGCTTTATGGGAGATTACAGAGATATGGAAAATCCTATGACTCCTATGTGGCCAACAACAC  
CAGCTATCTCTATGACAAGTGTGCCAGTAATTACAGTTGAACCCAAACCCCGATCATCGGTCCACGATCTGCAGCACA  
TGGGGAAATTTCCACTTCAAGACGTTTCGATGGTCATTTCTTTCAACTGCCAGACACATGCAACTATGTTCTGGCGGT  
GATGTGTGATGCCGCATCATCTGATTTTAACATCCAGATGCAAAGGGAGACTTTAAATGGCTCAATCTCATTTAGCA  
CAGTCTTAATAAAGCTGGACGGGACAGTTATCAAAGTCACCGACAGCGACATCACTATGGGTGAAGAAACGGTCACG  
GTTCTACTTATAAAAATGGAATTTAAATTGAGGGAAGTCCAACCGATTTCAAGATCTCCAACAAACATGGAGTGAC  
TGTCTTTTGGGAGGAAGACA ACTCTCTGTGCGATTGAACTTCTGAGAAGTATCAAGGCCAGACCTGTGGACTCTGCG

GAGACTTTAATGGCAACTTGGCTGATGATATCACTGATAATGGTCCGGCTACATGGAAGGTGTCCATATCAACTGAA  
ATCTGTGAGGAGGTCACTCTTCCATCTACTGGTCCGTGTGACGAGCTATCAGAGCAGGCAAGCTTTTGGCAGGAGTA  
CCTCATCAGTCCAGGGTTTGTGGCTGTTATGATGTGATGGACATGAGAATATTTTCAGAAAGCCTGTGTGAGCGACC  
TGTGTCAATGTTATGGCAACCATGACTGTCTGTGCAACACACTAACAGAGATCTCACGACAATGCACACATGCTGGA  
GGACAACCAGGAACATGGAGAACAGAACAGCTCTGCCCAAAGACGTGTCCCCTAAACCTGCAGTACCTGGAGTGTGG  
CGGTCCATGCAGGAACACCTGCTCAGGCCCAACTGCAAATCTAATGTGTACCGATCATTGTGTGGACGGCTGCTTCT  
GCCCTGAAGGCACCGTTGAAGATGACATNNNNNNNNNNNNNNNNNNNNNNNNNNNNNNNNNNNNNNNNNNNNNNNN  
NNNNNNNNNNNNNNNNNNNGAGAGTCTTACCAACAAGCTTGCAAATCATGTACATGTGATGCTGGACACTGGACCTG  
CACATACCTGGACTGTCCCGGCACATGCTCTGTTGTTGGAGGTTCTCACGTCACCACTTTTGTGAAAGAGCTTCA  
CCTTCAGCGGGAACCTGCGACTACATCCTCACTAACACTCTGCAGACAGTGACTTTGCTGTTGGGAAATCTGGCA  
AAGTGTGAAGCATCCCGAAGACACACTGCTTACTACTCAGTTACCCTTGTCTCTCTGGGACCCTATTAGTTTTTC  
CTCCAGTGGAGATGTGACATTAATAACATCAATTCAAAAGAGCTTCCCTTTCAGCATTGGTCTGTGAGTATCTTCC  
AGCCCTCTTCCCTCCTTATTATTGTTGATTTGACGAGCGTTCGTCTGGAGATTTCAGCTGGCTCCAGTCATGCAGTTG  
TACATTGTAGCCAGCACTGAAGAGAAAGGAAAAATGACTGGTCTGTGTGGGAACTATAATGATGTCCAAACAGATGA  
TTTTAAACTGAATCAGGCATTATCGAGGGCACCCCAACATCCTTTGTCAACTTTTGGAAACAAAACCTGTCCAGATC  
TTGAAATCACATTTGACAACCCATGCAGCTTGAACATGGACACAGAGAAACTTGCTAAAGACTGGTGTCCCGCCTT  
ACAAATCCAAATGGCACCTTTTCCGAGTGTCACTCAGAAATATGTCCTGAGATGTACTACCAAGGTGCGTCTATGA  
CACCTGCAAGTGTTCAGATATTAGGAAGTGCATCTGTGCAGCCGTGTCCACCTATGCCACGCATGTGCCGCCAGAG  
GAATCATTCTCCACGACTGGATGGATACAGACCCTTGTGAATCTGAGTGTCCGAAAACATGAAGCACTCCTACGAA  
GTGACCAGCTGTGGCAGCACCTGCCGCTCTCTCAGTGGACAAGAAAACACCTGCCAAGGGTCTTTCACACCTGTACA  
TGGCTGTGTTTGTCTGAGGGAACTACCTTAACGAAGAAGGCAAATGTGTACATGCTGGAATGTGTCTTGTATT  
ATGGCAACCAGGTTCATACAGCCATCCGCAGAGTTCAACAAGGAAGGTGCTAAATGCACCTGTAACAATGGCAAACCTG  
GATTGCTCCAGTCATGAAGACTGCGTGGCTCCAATGACATTTCTTCAAATGCTCACATCCTGGAGAAAAGGCACAGA  
ATGTCAGAGGACATGCGACAAAACAAGACCCAAAACAATTGCGTGAGCACAGGGTGTGTATCAGGGTGTATGTGTCTG  
AGGGCCTTTTGGCTGATGGAAATGGTGGATGTGTGATGAGGGAAAACCTGTCCATGCACCATAACGGTGTGCGAAGT  
TCACCTGGGGATCAAGTTCAACAGGACTGTAACACCTGCACATGCACAAAACGGTATGTGGATTTGTACACAGAAGGC  
ATGTTACGGCACCTGTACCATCTACGGTGAAGGTCAATTCAGGACTTTTGTGAGGCAACAGATACTCCTTCCATGGAG  
ATTTGTGAACACACCTTAGCCACGATATTATTGTGATGGAACCCCACTCCCTCTTTCGGCCTTGTGACGAAAACAT  
CCCTGTGCCACACCTCAATTTGCTCCAAGTCTAATTAATCTTTTTCTTCGGGAGATATGAGATGATTTTATCAGA  
GGATGATGGCGTGAAAGTTGTTGAAGGCAACGGCACAGAAATACAAATATCAAATCAATTATGGAGGCATATATGTGG  
TCATAGAGATCGAAGGTCTTCTGAACCTAATCTGGGATGAGAAAACAAGTGTGATGATCCAGCTCCATCCCAAATTA  
AAGGGCAATGTGTGTGGACTGTGTGGAACTTTGATGGCAATGCAAACAATGACTTCATGAAGCACAATGGGGAAAGT  
GGTGACAGATCCAGAGGAGTTTGGCAATAGCTGGACGGTGGATTCAAATGTCTCTGATGTGACAAATGTGATGCATC  
CTTGTGAAGCACATCCACATAGGAATTCCTGGGCTATCAAGCAATGCAGA

**F3 - IJ7 – catccctaggcacatccact**  
**R3 - IJ63 – tgTTTTgcgtcgcttaagaa**

CATCCCTAGGCACATCCACTGTTACACCAACTACTGGAACCTTCGGCACCAACTTCTACAGAAACACCATCCACAACA  
ACATCCATTACTTCACCAACGACTGAAACATCAACACCAACTTCTACAGAAACACCATCCACAATCACATCTACTGT  
TACACCAACTACTGAAACATCAACACCTACTTCAACAGAAACTACATCTACAACAATTCAGTAACAACCTATACCAA  
CAGAAACTCCATCTACAGTTGTTACAGTAACAACCTTTATCAACAGAAACTCCATCTACAACAGTTTCAGTAACAACCT  
ATACCAACAGAAACTCCATCTACAATTGTTACAGTAACAACCTATATCAACAGAAACTCCATCTACAACCTGTTACAGT  
GACACCTATATCAACAAAATCTCCATCTACAATTGTTACAGCAACACCCAAATCAACAAAAACACCATCTATAACTA  
TTGGATCTACAACAACCTATGTCAACAGAAAAACCTACTACATCTAGCAAATCTACAACAACATCCACATCAACAAAG  
CCTGTTACTACTACAACAAGTTCACTGTGCATACAGGTCCAGTTCGCACCACTCCAAATCCAGAACAACCATCAAC  
TCAATGTTAACTGCACATATTTAAATGCAATATTCTTACCAGGTCATCAATATACAATAAAAACAGATAAAGCAGGTT  
GGTGTCTTTTCCGCTCACTGCAACTCCTCGTGCAGTATTATCATACAGGCTGAGCCATGTGCAACAACAACACCCCA  
ACAACAACAACAACGACACCAACAACGACGACATCCAAACCGAACAATAATGATTGCACACAGGTCCAAAGAAA  
GAATATGGAGTCCCTGGATTGAAAACCTGCAAAAACCTACACGTGTAATAATGGCAAGGTAACCTCAGTGCCTCTACAGT  
GTGACAAATCTGACAAGGTGATGCCTACATGTACCAATGGAATTAAGGCTAAGAAGGTGTCTTATAACAACGGCTGC  
TGCTCTAGATATGAATGCGAATGTAAATGCAGTGGTTGGGGTGACCCACATTACCAATGTTTGTGGAACATACTA  
TGACTTCCAAGGAAATGCACTTACGTCTTGTTCAAAGAAATCGTCCCAAGATATAACATCAGTGCCTATGTTAAAA  
ACTACTTATGTGATCTTCAAATAATCTTGCCTGCCAGAGTATGTGATTGTGAACTACAATCATATAGCATTAAAG  
CTGACAAGCAACACCAAGAGATTGAGGTCTATGTTAATGATGATTTGAAACAACCTAAGTACGTCATAACAACCTT  
CTTCATCACCACTCTGGCATTGGAGTCAATTTTGAACATCACTGAAATCAATGTGAGATTACTGTGAATCATCAAG



GCTTTGTGATCAATCTCCCATTCTCCTACTTCAGTGGTAATACAGAGGGGCAGTGTGGGGTCTGCGACAACAATCGT  
ACAAATGACTGCAGACGTCTCTGATGGACAAATCGACAAATCGTGTGAGAACATGGCACAGCTTTGGATGGTTCCCC  
AGGATGCCAGCCTCCTAAACCTATACCTAAGCCTACACCTCCTCCAGTTATCTGCAACCCAGTATTTGTGAATACA  
TCAAGGGCGACATGTTTAAGGAGTGCCATGATCATATTCCTTACGAAAGTTATTACGAGTCATGCAAATTTGACGTG  
TGCCGCATGGGAAATCGCTCAATTGGTTGCACCAGTCTTGAGGCGTATGCTGCATTGTGTGGAAAAGAAGGCATCTG  
TGTGGACTGGAGAACCTCAGATGACCTCAAGCGAACATGTGCACACAATTGCCCCAGTCACAAAGTCTACAATGCAT  
GTGGACCTAAAGTGGAAAAAACCTGCAGTACCAGGTACAATGACTTGTGGTGGAGAAAGACTGTCAAGGCGCAAGC  
TGTCATCAAACATATATGGAAGGTTGTTTCTGTCTGATAACACCTATCTAGTTAGTTCAACGACAGATTACTGTAC  
GGCTTACTGCGACTGCATCGGCCCTGATGGATTACCTCGAGAGCCTGGAGACACATGGACCATGGACTGTTACACAT  
ACACCTGCTCCAATGAGACCTTTGGGATCACCAAAGACTTGTGGGTGCCACTATAGTACCCTGTGGACCTGAG  
CACAAACTAATCATTAAACAACCTGTCTCAACCTGCGTGTGATCTGGAGGTCTGTCTCCACAAGAAATGTGATGT  
GGGATTCGAGTTAGCGGAACACGCAAATGAAGGCAGTTGCTGTCCACTCTGTGTGCCCAAAGACGTCTGTGTGTACA  
ATAACACCGAGTACCAGCCTGGATCCACAATCTACCCAGACCCTTGTGTGCAATGTAAGTGTGACATGGAGAAAGAC  
CCAGAGACACAACCTACACACCGTCTCCTGCGTTTTCTAAAATCTGTGAACCTTGCCTTGAGGGCTTTGAGCTCGTGGA  
ACAAAACGGAGAGTGTGTGGAACATGCAAGCCAAATGCCTGTATTTATGTGTGAGATAACATCACACATATTCTCA  
GTGAGGGGAGAGAGTTACAATTATAAATGTGAAAGTGTGACCTGTGAGCAAGTCAATGGGACGTACATAATAGAGAGG  
ACCATAACCAACCTGTCCCAGAAATCAATCCAGATCAATGTGTGCCTGGAACACTGGGACTCGATGAAGATGGATGCTG  
CAACACCTGTGAACTCAAGAAGTGTGTTCTGTGTAAGAACATGACAGATGTCACAGTGAATGACTGCAAGTCCATCA  
ACCCATTGAAGTACATCCTGCAGTGGAACTGCGACACAGAATCAATGTATTCAATGGGCGCAAACACCATGATG  
CACAGCTGTTCTGTGTAAGGAGACGAAAACCGGTTAAAAAGGTGACGCTGAAGTGTGCGGACGGCAGTGAAT  
CCCTCATGACTACGTCTACATAGAGAGCTGCAGATGCACTCCTATTACATGCGAAAACAGAAAACCAATGGATAAA  
TGATCATGTTACATTGGTTTAAATGGCTACAATTCAGATATTACTGGAAAAATATGTATCTTTAGTGAATGACTGT  
ACCATTGAGCTCTTTGTTCTATAACTACTGTCACTGAGGGAATTTTTCCGGATATTTTGAATTGTTTTGTTTCTT  
AAGCGACGCAAAAACA

***muc5.2***

F1 - IJ68 – ctgagatgggtcatcctgct

R1 - IJ71 – gtctcgggtgatgaaggtgt

ATGGACTGTGGGACGGTGATGTTGTCCCACATGCGGATGCTGAGATGGGTCATCCTGCTGGCAGGGATGCAGTCTAT  
ACGAGCAGACTTCATGGGAGATTATGGAGACGGTATGAAGGACCCTATGGACTTTACTTGGCTGCCAACAACTG  
TGTCCCCACTATGACGACTGTGATGGTAACAAAAGTTGAACCCAAACCTGATCATCAGTCCCAGTCTGCAGCACA  
TGGGAAATTTCCACTTCAAGACGTTTCGATGGTCAATTTCTTTTCAGCTGCCAGACACGTGCAACTACGTTCTGGCGGT  
GATGTGTGACGCCGCAATTTCTGATTTTAAACATCCAGATGCAAGAGACACTGTCAATGGCTCCATCTCATTGGCT  
CAGTCATAGTAAAGCTGGACGGGACAGTCAAAAATCACAGACAGCGGCATCATGATGGACGATCAAGTGGTGTCT  
GTTCCGATCAATCAGAAGGGAATTAATAATAGAAGGAAGCCCAACAAGTATTAAGATCTCCAGATATGGAATGACCAT  
CTTTTGGGAAGAAGACAACCTCTATAGCGATTGAACTTGCAGGAGAAATATAAAGGGCTGACATGTGGACTCTGCGGAA  
ACTACAATGGCGACAAGGATGATGATATGCCTGAGAGTGGTAAATGTCATGTTTTTGTAGTGTGATCCACATGGAAG  
ATCTCAACACCAACTGAATCCTGTGAAGACGTTATACTTCCACCCAAGGATCAGTGTGACCAGAACACAATGGTTTG  
CCAGCAGTACCTCAGCAGTCCAGGGTTTGTAGTGGCTGTTATGATGTGATGGACATGAAAATATTTGAAAAAGCCTGTG  
TGAGCGACATGTGCCAATGTTACGGCAGCCATGACTGTCTGTGCAACACGCTAACAGAGATCTCACGACAATGCACA  
CATGCTGGAGGACAACCAGGAACATGGAGGACAGAACAGCTCTGCCCAAAGATGTGTCTATAAACCTGCAATACAT  
GGAGTGTGGAGGTCCGTGTAAGAGCACTTGTCTGATCCAACCTGCACATCTAATGTGTAAAGATCACTGTGTGGATG  
GCTGCTTCTGCCCTGAAGGGACCGTTGAAGACGACATTGGTCCAGGGTGGTTGTGTTCTGTAAACGAGTGTCCATGT  
GTGCATGATGGCACAGTATATAAATCAGGAGAGTCTTACCAACAAGCTTGCAAAAAATGTTTTTGTGCCGCTGGGCA  
CTGGACCTGCACATACTGGACTGTCCCAGGACATGCTCTGTTGTTGGAGGTTCTCACGTCACCACTTTTTGATGGAA  
AGAGCTTACCTTCCAGCGGAACTGCGACTACATCCTCACTAAGCACTCTAACGACAGTACTTTGCTGTTGTGGGA  
AATCTGGCAAAATGTGAGCCAGCAGCAACAGACACATGTCTTAATTCAGTTACCCTTGTGATCTCTGGAACCACTGT  
AAGCTCTAGATTTTGTATCCTAACCCTCTTTTCAATGTCCCAGGTCCTGTGAGCATCTTCCAGCCCTCTTTGTCTT  
TCATTATTGCTGATTTAAACAGTCTTCGTCTGGAAATCCAGCTGGCTCCAGTTATGCAGTTGTACATTGTAGCAAGC  
ACTGAAGAGAAAGAAAAATGACTGGACTGTGTGGAAACTACAATGATGTCCAATCAGATGACTTTAAAACAGATTT  
GGGTATCACAGAGGGCACAGCGATATCTTTTGCCAACTTTTGAAGAAAACCCCATATAGTTGTCTGCTGTTGAAA  
ACACATTTGACAACCCCTGTAGCCTGAGTGTGGACACAGAAAACCTTGTAAAGACTGGTGTCCCGTCTGACTAAC  
CAAAGTGGAGCCTTTTCTGCATGTCATTAGAAAATATGCCCAAAGATTTACTATGAAAGGTGCGTCTATGACACCTG

CAAGTGTGCAGATATCAGGAAGTGCATCTGTGCGGCTGTGTCCACTTATGCCCATGCTTGTGCTGCAAGAGGAATCA  
TTCTCCAAGGCTGGATGGATTACAGACCCTTGTGAATCTGAGTGTTTCAGAGAACATGAAGCACTCCTACGGTATGACT  
GGCTGTGGCCTCACCTGCCGTTCTCTCAGTGGACAAGAAAACACCTGCCAAGGGTCCTTCACGCCTGTAGATGGCTG  
TGTTTGTCTGAGGGAACCTACCTTAATGAAGAAGGCATCTGTGTGCCTGCTGACCAGTGTCTTGTACAGCGGTG  
ACCAGGTACAAAACCTTCGGAAGTATCCCACGTAGATGGTCTAACATGCACCTGTAAACTTGGCAAACCTGCACTGC  
TCCAATCCTGAAAGTAAGTTTCAACCCTGTGTTGCTCCAATGGTGTCTTCAAATGCTCAAATTATGAACCAGGAAA  
AAAGGGCACAGAGTGTGAGAGAATGCCAGAAAACAAGACATTAACAATTGTGTGAGCACAGGGTGTGTATCAGGGT  
GTATGTGTCCAGATAACCTTCTGGCTGATGGACAAGGTGGATGTGTGGAGAGGGAAAAATGTCCCTGTGTCCACAAT  
GGAGTTACCTATTATCTGGAGAACAAGTTCAAGAGGACTGTAACACCTGCACATGCAGAAATGGGATGTGGGATTG  
CACGAAAAAGAGTGTACGGCACCTGCACCATCTATGGTGAAGGTCAATTCATGACATTTGATGGCAAGAAATATT  
CTTCCATGGAGACTGTGAACAAATCTTAGTCCATGATTACTGCAATACAGACCAGAGTCCATACTCTTTACGCCTT  
GTCACAGAAACATCCCATGTGGCACCTCTGGAACCATTTGCTCCAAGTCCATCAATCTTTTCTTTGGGAGATACAA  
ACTGATTTTATCAGAGGAGAAAAGAAATCAAGTTGTTGAAAGCAATGGCACAGATTACCAATACCAAATCCATACTG  
CTGGGATATACAATGTCATTGAGGTCAAAGGTCTGTTGAACTTAATCTGGGACAGTAAAACAAGTGTGATGCTCCAA  
CTGCATCCCAAGTTTAAAGGGCAAGGTGTGTGGATTGTGTGGAAACTTTGATGGTAATGCTAACAATGACTTTTATGAA  
ACATGATGGAGAAGAAGTACCCGATCCAGTGGTATTCGGGAATAGCTGGAAGTCAATCCAGGCTGTCCGGATGTGA  
GCAATGTTATGAACCCATGTGAAAAGAATCCACACCCGAGTGCCTGGGCTATCAAACAATGCAGCATCATTACAAGC  
CCTGTCTTTTTCAGACTGCCATTCACGTGTGGACTCTGGCCATACTATGATGCCTGTGTAAGGACACCTGTGCATG  
CGATAGCGGGGTGACTGTGATTGTTTCTGTACTGCAGTGGCTGCTTATGCTGCTGAATGCCGTAACCCGGTGCTT  
GCGTAGCATGGCGAAGCCCAAGTATTTGTCCTTTATTCTGTGACTATTACAACAACCCTCCAAGTGAATGTGAATGG  
CACTATAAAACCTGCGGATCGACCTGCATGAAAACCTGCAGAAACCCATCAGGAACCTTGTCCAATCAAATCCCCT  
CCTAGAAGGATGTTTTCTCAGTGTCTTCTGAAAGACCATTTTTGAGAGAGGACAACAGGAAATGTGTTACAGAGG  
CAGAATGTCTTTCTCTGTACTTATGATGGCAAGATATACACGACTGGAGATGTGATGTACGATACCACAGATGGG  
AATGGTACATGCTTTACAGCTGTGTGTGGATCCAATGGAGAGATAATAAGAAGCATTAATAAATGTATGACAACAAC  
TACACCATTACGTTTACAACCTCCACCCCAAACACCAACACCTTCATCACCCGAGACATATACTTCTGTTACTGCTG  
CAACACCTTCGACAGAGAGGCCACCAACATCCGAATTGCAAAGGCCAAAAACAACACTACTACAACCTTCTGGTCCAACA  
ACAAA

***muc5.3***

F1 - IJ80 – cgagcaatatgcacagcact

R1 - IJ81 – gctcgagcagttgaaaaacc

TTTTTCAGCAAGATTGTGACCAGGGGCAGTGGGATTGTTACATAAAGGATTGTCCCCATTTCATGTTTCAGTGGAGGGCG  
GATCCCACATTACCACATTTGATGGAAAAGCATAACACATTTTCACGGAGACTGCACCTTACGTCTGTCCAAACATTGT  
TCTGGCACAGAATTCACAGTTCTAGGAGACCTGGTGAATGTGGTCTGACTGAGACCGAAACCTGTCTGAAGGCAAT  
AACCGTGGCGTTGTTTGTGGAATTAAGTATTAACTGTTAATTAACGTGGACTCCAGCGGAAACGTTGAGGTCAACAGAATAGTTG  
CTCAACTTCCACTTTTTTACATCTTCAGTGTGTTTTCAGGCCCTCCTCATTCTACATCATCATTGAAGCTCCGCTG  
ATTGGGCTTTCGTCTGGAGATCCAGCTGGTGCCAATAATGCAGCTTTACATCACAGCCAATTCAGTGTATCAAGGAGA  
AACATGTGGTCTTTGTGGCAATTACAACAACATGGAGGCTGATGACTTCACAACCATCGGTGGACTCCGAGAAGGAA  
CAGCTCTGGATTTTGCACACCTGGAAAACAAGAGCAAGCTGCCCTGATGTTAAGAGAAGCTTTGAGAACCCGTGC  
AGTCTGAGCACAGAAAACGAGCAATATGCACAGCACTGGTGTTCCTGCTGTCTGATCCCTCGTCAGTTTTTGTCTCC  
GTGTCACACTGAAGTCAACCCTGAAGTCTACCAAGCAAACCTGCATCTACGACAGCTGTAACAGTGAAGGAGCCAGG  
ACTGCAAGTGTGCGCATTATCATC

***muc2.1***

F1 – IJ125 – tgctgcttctggcgcttctggt

R1 - GY2 – cataaccaatttccccatcg

TCCGATGGCTCGAGTTTTTAGCTGCATGCTGCTTCTGGCGCTTTCTGGTATTCAGGTCGATTCAAAAAAGGTCTCTC  
CTAGTAATCATGTCAACAGCATCTGCAGCATGTGGGGAAACTTCCACTTCAAGACCTTCGATGGGGACGTCTATCAA  
TTCCCAGGGATGTGCGAGTACAACCTGGTGTCTGACTGCCAAAGCCTCATTTCGACAGTTTTTCGATTTACGTGAAGAG  
GACTGAACGCAGCACTGGCCCAAAGATCAGCAGGGTCTCCATAACCATCAACGACATCGCCATTGAGTTGACCGAGA  
ACCAAGTCAACGTCAATGAAGCAAAAGTACGCTGCCCGTCCATGTGTCTCAGGAATCCTTGTGGAAGAAAACACAATT



CTGCACTTATATTTTAAATGAAGGAAATTAGCCCTCAATTCAATTTAGCAATCTACATTGAGAATGTCTACTGTGACC  
CTGCTGAGAATGTATCCTGTCCCAGATCCCTTATTGTGTCTTACAACAAACAAAACATTACACTTAGAAGTCACAGG  
CTAATGGGAGGAGCAAATCTAGAGGCTCTAGAGGGAAATATTATGCTAGCACTGCCGTATGATAATAATGGCCTGAG  
GGTTATTAGTTTACAGACCTAAACTTATTACTAGAGATTCCAAAACCTCAACGCCTATGTACTATTTGGAGTCTCTGGCT  
TCAGCATCAACCTGCCATTCCAGTATTTTGGAAAAACACAGAAGGCCAATGTGGAACATGCAACAACAACCAGAAT  
GATGATTGCCCTGGATCCTTGGCAAACGACTGTAAAATAATGGCAGAGAAGTGGAACTACTACAGTTTGCCTCCACC  
AGCTCCATTACCTACTCCTAACTCACCCTATGTCCACCCTGACTGCTACTACTAAACACCACGTTTGAAGCGTGCC  
ACTCCCATGTGCCTCCTGAAAACCTCTTTTTCAGCCTGTCAATATGACAGCAGTAATAACCCTGCTGAAGTGTGTGCC  
AGTCTGCAGAGCTACGCAAGCGTCTGTGCAATGTTTGGGGTCTGCATATACTGGAGGAACACACAAGCCAATGCAA  
TATTGGTTGTTTCCAGAAAGATAAAGTGTCTTGCCTTGTGGTTTCAATTTGAACCGCAACATGTAGAGATAGACAAATGG  
AGAGCAACATTACAGTGTCCACAGAAGGCTGCTTCTGTAGTCAGAACAACAACACTCTTACCAAGGATTCTGGAGTG  
TGTGTGCCACAACCCTGCGGATGCTTGGACTCATCTGGGAAACCACGTAGGTTTAAATGAGAATTTTACGCACAACCTG  
TGAGGACTGTGTCTGTGATAAAGGCCAGGATGTCAGTCATCTGTGAACCCAAGAAGTGTCCCGATGTGCCCCCTGTGA  
ACTGCACTGAGCCCTTCATGGTGGTCAATGTCACCGATCCATCAGAGCCATGCTGCAGCAGACAAGTTTGAATTTGT  
AGCATGTGCCCATTTTCGGAGGAAAAGTGTGAGGTTGGATATGAACTGATTGTGCACCCTTACGGAGACTTCTGTCC  
AGAAATCAGATGCGAGTCAAAAAGAAGTGTGTGCCTACAACAACACAGAATATAAGCCTGGGAGTAAAATCCACGTAG  
GGCCTTGTGTTAAATGTAAGTGTGAATGGGACCCATGGACTGAACTATATCAAATGAATTGTTTCTATGAAGTTTGC  
CCTGATGATGAGTGTATGAGGGGTTTGAATATGTGAAACAAGATGGAGAGTGTGTGGAACATGTAAACTAATGAG  
CTGCATTTATTATAGAGAGAACAACACTAAACACATTCTTTCATGATGGAGATGTCAAGAATTTTACATGTGAAACTG  
TTTCTTGTGATGAAATAAATGGCTCATTTTTTATTGATTGAAAAACCAAAACAGTGTGTTTCGTACTCGAGTGTGCACGTC  
TGCGAGTATGGGTTTGAATATGTGATGAAAGAAGGCGAGTGTGTGGAACATGTGAACCAGTGGCCTGTATTTATCA  
ATCACCACAACACCATAACATATTCTCAAGGATGGACAAGAGTTTAAAGTATAAATGTGAAACTGTTACCTGCAATC  
ATATTAATGACTCATTTGAGATGAACATAACCAACATGGAATGTATTCAATTGAGTTTACAGAGGACTGTGCGTCTGGC  
TTTCAATATATGAAAAAGATGGAGAGTGTGTGGGTCTGTGTGTACAAGTGGCCTGTATTTATGATGCTCCAGACAA  
AACCACACATGTTTCTCCAGGAAGGACTTTCATACAATATATCATGCATGAATGTCACATGTCTGAAAAGGAATGACG  
TGTTTACGATAAAGGAAGAAATGAAAAATGCCCTTCTTTTAAATCAAGATGACTGTGTGGAGGGAACAAAGCAATTT  
GATGAGGATGGATGTTGCCCAAACCTGTGAAACTCGTAACTGTGCTCCTGTGAAGAACGTCCTCGTCTGAAAGTCAA  
TAATTGCACTTCAACTGAAGATGTTGAAATTACATCCTGCGCTGGTCACTGTGACTCCAAATCAACTCTGGATCTAC  
ATGGATACATGATGAACAGCTGTTTCTGCTGCCAAGCAGAGAGATCCAGCATTTCGAGAGG
